# 1 Multi-omics profiling of living human pancreatic islet 2 donors reveals heterogeneous beta cell trajectories 3 toward type 2 diabetes 4

5 Leonore Wigger<sup>1\*</sup>, Marko Barovic<sup>2,3,4\*</sup>, Andreas-David Brunner<sup>5\*</sup>, Flavia Marzetta<sup>1</sup>, Eyke  
6 Schöniger<sup>2,3,4</sup>, Florence Mehl<sup>1</sup>, Nicole Kipke<sup>2,3,4</sup>, Daniela Friedland<sup>3,4</sup>, Frederic Burdet<sup>1</sup>,  
7 Camille Kessler<sup>1</sup>, Mathias Lesche<sup>6</sup>, Bernard Thorens<sup>7</sup>, Ezio Bonifacio<sup>3,4,8</sup>, Cristina Legido  
8 Quigley<sup>9</sup>, Philippe Delerive<sup>10</sup>, Andreas Dahl<sup>6</sup>, Kai Simons<sup>11</sup>, Daniela Aust<sup>12,13</sup>, Jürgen Weitz<sup>14</sup>,  
9 Marius Distler<sup>14</sup>, Anke M Schulte<sup>15</sup>, Matthias Mann<sup>5#</sup>, Mark Ibberson<sup>1#</sup>, Michele Solimena<sup>2,3,4#</sup>

10

11 <sup>1</sup>Vital-IT, SIB Swiss Institute of Bioinformatics, Lausanne, Switzerland; <sup>2</sup>Department of  
12 Molecular Diabetology, University Hospital and Faculty of Medicine, TU Dresden, Dresden,  
13 Germany; <sup>3</sup>Paul Langerhans Institute Dresden (PLID), Helmholtz Center Munich, University  
14 Hospital and Faculty of Medicine, TU Dresden, Dresden, Germany; <sup>4</sup>German Center for  
15 Diabetes Research (DZD e.V.), Neuherberg, Germany; <sup>5</sup>Max Planck Institute of Biochemistry,  
16 Martinsried, Germany; <sup>6</sup>Deep Sequencing Facility, CMCB Technology Platform, Dresden,  
17 Germany; <sup>7</sup>Center for Integrative Genomics, University of Lausanne, Lausanne, Switzerland;  
18 <sup>8</sup>DFG Center for Regenerative Therapies Dresden, Medical Faculty, TU Dresden, Dresden,  
19 Germany; <sup>9</sup>Steno Diabetes Center Copenhagen, Gentofte, Denmark; <sup>10</sup>Institut de Recherches  
20 Servier, Pôle d'Innovation Thérapeutique Métabolisme, Suresnes, France; <sup>11</sup>Lipotype GmbH,  
21 Dresden, Germany; <sup>12</sup>Department of Pathology, Medical Faculty, University Hospital Carl  
22 Gustav Carus, TU Dresden, Dresden, Germany; <sup>13</sup>NCT Biobank Dresden, University Hospital  
23 Carl Gustav Carus, TU Dresden, Dresden, Germany; <sup>14</sup>Department of Visceral, Thoracic and  
24 Vascular Surgery, University Hospital Carl Gustav Carus, Medical Faculty, TU Dresden,  
25 Dresden, Germany; <sup>15</sup>Sanofi-Aventis Deutschland GmbH, Diabetes Research, Industriepark  
26 Höchst, Frankfurt am Main, Germany.

27

28 \* equal contribution

29 # corresponding authors

30

31

## 32 Abstract

33

34 Existing studies do not sufficiently describe the molecular changes of pancreatic islet beta  
35 cells leading to their deficient insulin secretion in type 2 diabetes (T2D). Here we address  
36 this deficiency with a comprehensive multi-omics analysis of metabolically profiled  
37 pancreatectomized living human donors stratified along the glycemic continuum from  
38 normoglycemia to T2D. Islet pools isolated from surgical samples by laser-capture  
39 microdissection had remarkably heterogeneous transcriptomic and proteomic profiles in  
40 diabetics, but not in non-diabetic controls. Transcriptomics analysis of this unique cohort  
41 revealed islet genes already dysregulated in prediabetic individuals with impaired glucose  
42 tolerance. Our findings demonstrate a progressive but disharmonic remodeling of mature  
43 beta cells, challenging current hypotheses of linear trajectories toward precursor or trans-  
44 differentiation stages in T2D. Further, integration of islet transcriptomics and pre-operative  
45 blood plasma lipidomics data enabled us to define the relative importance of gene co-  
46 expression modules and lipids positively or negatively associated with HbA1c levels,  
47 pointing to potential prognostic markers.

48

## 49 Introduction

50

51 Type 2 diabetes (T2D) mellitus collectively defines a cluster of genetically complex  
52 pathological states characterized by persistent hyperglycemia, often leading to  
53 cardiovascular complications, kidney failure, retinopathy and neuropathies. Affecting more  
54 than 450 million people, with rising incidence rates over the past decades, this syndrome is  
55 a major threat for public health and society globally<sup>1</sup>. Common determinant and ultimate  
56 cause of T2D is the inability of pancreatic islet beta cells to secrete insulin in adequate  
57 amounts relative to insulin sensitivity, in the absence of evidence for their autoimmune  
58 destruction or a monogenetic deficit. Beta cell failure typically results from a lengthy process  
59 spanning many years. Remarkably, however, it can be rapidly reverted upon bariatric  
60 surgery or severe caloric restriction<sup>2,3</sup>. These observations argue against the occurrence of  
61 major beta cell apoptosis in T2D, especially since adult beta cells hardly replicate, while  
62 robust evidence of beta cell neogenesis after puberty is also lacking. Hence, the prevailing  
63 opinion is that persistent metabolic stress drives mature beta cells to phenotypically de-  
64 differentiate into progenitor cells or trans-differentiate into other islet endocrine cell types  
65 over time<sup>4-6</sup>. As the pathogenesis of beta cell dysfunction in T2D remains largely unclear,  
66 the diagnosis of this disease relies on accepted, but still surrogate parameters and cutoffs  
67 that have been primarily developed for clinical practice to optimize therapeutic interventions<sup>7</sup>.

68

69 Insight into molecular alterations associated with impaired insulin secretion in T2D has been  
70 largely obtained from pancreatic islets isolated enzymatically from brain-dead or cadaveric  
71 subjects classified according to a categorical division into non-diabetic and diabetic, rather  
72 than on a continuum from euglycemia to steady hyperglycemia. This approach has multiple  
73 shortcomings<sup>8</sup>. Briefly, islet researchers do not generally have access to extensive clinical  
74 and laboratory information about the donors prior to their admission to an intensive therapy  
75 unit<sup>9</sup>. Moreover, the islet state is perturbed by the metabolic stress associated with a  
76 terminal condition and the related pharmacological treatments<sup>10,11</sup>. Enzymatic isolation of

77 islets and their *in vitro* culture can further change their molecular profile<sup>12,13</sup>. In the attempt to  
78 overcome, at least in part, these limitations, we established a complementary platform for  
79 the procurement of islets which relies on the collection and analysis of pancreatic specimens  
80 from metabolically profiled living donors undergoing pancreatectomy for a variety of  
81 disorders<sup>8,14</sup>. We showed that this approach is very reproducible and scalable and provides  
82 a novel view on transcriptomic and functional alterations in pancreatic islets of subjects with  
83 T2D<sup>15–17</sup>.

84

85 The aim of the present study has been to profile in greater detail gene expression changes  
86 occurring along the progression from euglycemia to long-standing T2D in human islets *in*  
87 *situ* and to integrate this knowledge with clinical traits, circulating lipid levels and the islet  
88 proteome, hence enabling inferences about the mechanisms driving islet dysfunction and  
89 the identification of potential biomarkers for it.

## 90 Results

### 91 Recruitment of a large cohort of living donors for islet and plasma omics 92 data

93

94 To gain insight into the history of islet cell deterioration along the progression from normal  
95 glycemic regulation to T2D, we collected surgical pancreatic tissue samples from 133  
96 metabolically phenotyped pancreatectomized patients (PPP). Eighteen were non-diabetic  
97 (ND), 41 had impaired glucose tolerance (IGT), 35 Type 3c Diabetes (T3cD) and 39 T2D  
98 (Fig. 1A and Fig. 1B). These group assignments were based on glycemic values at fasting  
99 and at the 2 h time point of an oral glucose tolerance test (OGTT) using the thresholds  
100 defined in the guidelines of the American Diabetes Association<sup>7</sup>, or, when applicable, on a  
101 previously established diagnosis of T2D. In this cohort, 51.9% were males and the mean  
102 age was 65.36±11.54 years, with ND PPP being on average younger than the other three  
103 groups (Fig. 1C and Supplementary Table S1). The body mass index (BMI) was significantly

104 lower in ND compared to IGT, T3cD and T2D PPP. The HbA1c value, as a parameter of  
105 longer-term glycemia, was  $5.25\pm 0.3$  in ND,  $5.75\pm 0.42$  in IGT,  $6.29\pm 0.95$  in T3cD and  
106  $7.41\pm 1.29$  in T2D PPP (Fig. 1C and Supplementary Table S1). Moreover, based on  
107 histopathology, malignant tumors occurred in 50%, 60.97%, 74.29% and 69.23% of ND,  
108 IGT, T3cD, and T2D PPP, respectively (Supplementary Table S1).

## 109 Pancreatic islet gene expression and pathways drift progressively with 110 glycemia deterioration

111

112 Gene expression profiles of islets isolated by laser capture microdissection (LCM) from  
113 resected and snap-frozen pancreas samples of ND, IGT, T3cD and T2D PPP were  
114 assessed by RNA sequencing. After removal of genes with low expression levels, the overall  
115 islet transcriptome encompassed 19,119 genes, of which  $14,699\pm 693$  were present (raw  
116 read counts  $>0$ ) in ND PPP,  $14,967\pm 455$  in IGT PPP,  $14,939\pm 493$  in T3cD PPP and  
117  $14,997\pm 428$  in T2D PPP. Genes with a fold change (FC) $>1.5$  and a false discovery rate  
118 (FDR) $\leq 0.05$  were considered to be differentially expressed (DE) between the groups.  
119 Pairwise group comparisons of IGT vs. ND, T3cD vs. ND and T2D vs. ND revealed an  
120 exacerbation of gene dysregulation with deterioration of glycemic control (Fig. 2A). Notably,  
121 no DE islet genes were identified between IGT vs. ND, while 161 and 650 DE genes were  
122 found between T3cD vs. ND and T2D vs. ND, respectively (Fig. 2A and Supplementary  
123 Table S2).

124

125 Restricting the transcriptomic analysis to libraries in which insulin (*INS*) was the most  
126 expressed gene resulted in the retention of islet datasets from 15 ND, 35 IGT, 21 T3cD and  
127 24 T2D subjects, without dramatically affecting the overall composition of the cohort in  
128 regards to diabetes status and major descriptive parameters (Supplementary Table S3).  
129 Deconvolution analysis indicated that in 97.8% of retained samples the proportion of beta  
130 cells was  $>50\%$  (Supplementary Fig. S1), supporting the choice of this strategy to

131 discriminate samples especially enriched in beta cell transcripts. Despite the expected  
132 reduction in statistical power due to ~ 30% smaller size of this “restricted” cohort (92  
133 samples retained from 133), the number of DE genes between islets of T2D vs. ND PPP  
134 increased by 51% to 984 (782 up, 202 down), and by 59% to 256 (209 up, 47 down)  
135 between islets of T3cD vs. ND PPP (Fig. 2A, Supplementary Table S4). Seven of the 984  
136 DE genes are known risk genes for T2D, two upregulated (*SGSM2* and *BCL2*) and five  
137 downregulated (*RASGRP1*, *G6PC2*, *SLC2A2*, *ZMAT4* and *PLUT*)<sup>18</sup>, while most of the  
138 remaining genes have not been previously reported to be altered in islets of subjects with  
139 T2D<sup>14,19</sup>.

140

141 Among the DE genes in islets of T2D PPP, *INF2* and *AKR7L* were negatively correlated in a  
142 moderate fashion with duration of the disease measured in years (Spearman correlation  
143 coefficient -0.32 and -0.41 respectively), albeit they were both upregulated relative to islets  
144 of ND PPP. Most notably, this filtering step enabled, for the first time, the identification of 185  
145 DE genes between islets of IGT vs. ND PPP. Most of these DE genes were upregulated  
146 (181/185), and 98 also dysregulated with the same directionality (97 up, 1 down) between  
147 islets of T2D vs. ND PPP. Intriguingly, and apparently at variance with previous eQTL  
148 findings<sup>20</sup>, the T2D risk gene *ARAP1* and its neighboring gene *STARD10* were both  
149 upregulated and among the 77 genes dysregulated in islets of IGT PPP only. No islet cell  
150 type specific genes<sup>21</sup> were enriched in any of the differential expression analyses.

151 Furthermore, no shift of islet cell type proportions with the progression of the disease was  
152 observed in the deconvolution analysis (Supplementary Fig. S1A).

153

154 For both the “restricted” and the full data set, heatmaps of gene expression levels in the four  
155 patient groups were prepared as a visual complement to the statistical analysis (Fig. 2B and  
156 Supplementary Fig. S2A). Despite the marked differences between the findings in the  
157 “restricted” and complete cohort, upregulation prevailed as the direction of gene  
158 dysregulation in both of them (Fig. 2A and Supplementary Fig. S2A). Based on these

159 observations, pancreatic tissue sections of 5 ND and 5 T2D PPP with the “restricted” cohort  
160 were immunostained with antibodies specific for histone H3 and H4 lysine acetylation – an  
161 epigenetic modification associated with greater access of transcription factors to promoter  
162 sites resulting in increased gene expression. Notably, the immunoreactivity for both  
163 acetylated histones was remarkably increased in the islets, and also in the surrounding  
164 exocrine cells of T2D PPP, and to a lesser extent IGT PPP (not shown), compared to ND  
165 PPP (Fig. 2D).

## 166 Extracellular matrix and mitochondrial pathways are perturbed in T2D 167 and IGT subjects

168

169 We further analyzed differentially expressed gene functions by gene set enrichment analysis  
170 using Gene Ontology terms and KEGG pathways (Fig. 2C, Supplementary Fig. S2B and  
171 Supplementary Tables S5 and S6). Results obtained from the different gene set collections  
172 cross-validated each other, since similar biological themes emerged. Islets of pre-diabetic  
173 and diabetic subjects displayed upregulation of islet genes that were functionally related to  
174 cell-extracellular matrix interaction, immune response and signaling pathways, while  
175 expression of genes related to RNA processing, protein translation and mitochondrial  
176 oxidative phosphorylation were downregulated. Importantly, the analysis performed on the  
177 “restricted” cohort, differently from the full dataset, also revealed that the strength of the  
178 enrichment increased with progression of the disease (Fig. 2C and Supplementary Fig.  
179 S2B). These data suggest that early dysregulation of gene pathways exacerbates with the  
180 decline of beta cell function.

## 181 Weighted gene co-expression network analysis identifies islet gene 182 modules correlated with the elevation of HbA1c

183

184 To globally interpret transcriptomic data and identify sets of genes likely to be functionally  
185 related and co-regulated, we grouped genes based on similarities in their expression profiles



186 into modules using a network-based approach<sup>22</sup>. In the cohort of 133 PPP, we identified 36  
187 co-expressed gene modules, which were arbitrarily labeled M1 through M36. The expression  
188 profiles of the genes in each module were summarized by a module eigengene, or first  
189 principal component of the expression matrix. Module eigengenes were used to  
190 computationally relate modules to one another and to genes or clinical variables. Correlation  
191 between module eigengenes and diabetes-related clinical traits revealed modules M9 and  
192 M14 as those with the highest positive and negative correlation with HbA1c, respectively  
193 (Fig. 3A and Supplementary Table S7). The former consisted of a set of genes that showed  
194 similar patterns of increased expression in most PPP with T2D (Fig. 3B), while the latter was  
195 mostly composed of genes with coordinated down-regulation in diseased subject samples  
196 (Fig. 3C).

197 We next evaluated how close a gene was to a given module, denoted as module  
198 membership, by correlating its expression profile with the module eigengene. This analysis  
199 allowed us to identify highly connected genes or “hub” genes for HbA1c-related modules  
200 (Fig. 3D-E). These included genes that we had previously identified as differentially  
201 expressed in subjects with T2D<sup>14,15</sup>, and which were correlated with HbA1c either positively,  
202 such as module M9 genes *ALDOB* (FC=8.45 with adj.  $p<0.001$  in T2D vs. ND in “restricted”  
203 cohort) and *FAIM2* (FC=7.11 with adj.  $p<0.001$  in T2D vs. ND in “restricted” cohort) or  
204 negatively, such as module M14 genes *SLC2A2* (FC=-2.77 with adj.  $p<0.001$  in T2D vs. ND  
205 in “restricted” cohort) and *TMEM37* (FC=-1.73 with adj.  $p<0.001$  in T2D vs. ND in “restricted”  
206 cohort). Interestingly, we (Supplementary Fig. S3A) and others<sup>23</sup> found *ALDOB* to be  
207 upregulated in islets from 13-week-old diabetic *db/db* mice compared to the heterozygous  
208 *db/+* littermate (Supplementary Fig. S3A) as well as in a mouse beta, but not alpha, cell line  
209 upon exposure to high glucose (Supplementary Fig. S3B). However, the overexpression of  
210 *ALDOB* in beta cells of T2D PPP could neither be verified by in situ hybridization using the  
211 RNAScope platform (data not shown), nor by immunofluorescence on tissue sections due to

212 the cross-reactivity of the available anti-ALDOB antibody with other aldolase isoforms  
213 (Supplementary Fig. S3C).

## 214 Proteomics of LCM-isolated pancreatic islets reveals heterogenous 215 profiles of T2D subjects and extends target identification

216  
217 To verify and extend the transcriptomic data at the functional level of proteins, we analyzed  
218 the mass spectrometry (MS)-based proteomic profiles of LCM pancreatic islets from five ND  
219 and five T2D PPP (Supplementary Table S8). Using a very high sensitivity workflow on a  
220 novel trapped-ion mobility Time of Flight mass spectrometer<sup>24</sup>, we identified 2,237±499 islet  
221 proteins for ND PPP and 1,819±412 islet proteins for T2D PPP (Figure 4A). Quantitative  
222 reproducibility between biological replicates was high with Pearson correlations ranging from  
223 0.83 to 0.95 (Supplementary Fig. S4A). Principal component analysis (PCA) clustered the  
224 data into two distinct groups matching the clinical stratification (Fig. 4B). Interestingly, islets  
225 of ND PPP clustered closely, indicating a very similar proteome signature, while those of  
226 T2D PPP revealed substantial proteome heterogeneity among each other. Differential  
227 expression analysis confirmed that islets of T2D and ND PPP have very different proteomic  
228 profiles. The main differential drivers are well-characterized markers of pancreatic islet cells,  
229 including SLC2A2<sup>25</sup>, and many proteins implicated in mitochondrial structure, translation,  
230 energy supply and amino acid or fatty metabolism such as YMEL1, MRPL12,  
231 BA3(C14orf159), ACADS and its paralogue ACADSB, which were highly depleted in islets of  
232 T2D PPP (Fig. 4C). Besides AKR7L, ACADS was the only other upregulated and  
233 differentially expressed gene in islets of both IGT and T2D PPP, while being also  
234 downregulated at the protein level. All differentially expressed mitochondrial proteins are  
235 encoded by the nuclear genome (Fig. S4B). Intriguingly, the level of the sulfonylurea  
236 receptor ABCC8 subunit<sup>26</sup> was also strongly reduced in islets of T2D PPP. This  
237 downregulation might be an effect secondary to pharmacological treatment, as three among  
238 these patients had been treated with anti-diabetic SUR1 antagonists glibenclamide (DP197),  
239 glimepiride (DP118) or mitiglinide (DP087) (Supplementary Fig. S4C). We found the

240 glycolytic enzyme ALDOB to be on average four-fold upregulated in islets of T2D vs. ND  
241 PPP. This is consistent with our transcriptomic data (ALDOB FPKM:  $76.16 \pm 50.82$  in T2D  
242 PPP vs.  $4.63 \pm 0.95$  in ND PPP;  $p=0.03$ ) and with previous<sup>14,15</sup> and our current WGCNA  
243 analyses. Other proteins robustly overexpressed in islets of T2D PPP included the alpha-L-  
244 fucosidase FUCA1 and the surface marker for hematopoietic stem cells THY1.  
245 Next, we employed the proteomic ruler algorithm and annotations of subcellular localization  
246 to compare the protein mass distribution of major cellular compartments<sup>27</sup> (Fig. 4D). Islets of  
247 T2D PPP lost an estimated protein mass of 6% in the Golgi apparatus, 24% in the  
248 endoplasmic reticulum, and 27% in the mitochondria compared to those of ND PPP, while  
249 cytoskeleton protein mass was unchanged. Unsupervised hierarchical clustering of all 2,622  
250 detected proteins, clustered the data according to clinical categories (Fig. 4E). One-  
251 dimensional gene ontology enrichment<sup>28</sup> revealed two distinct clusters whose protein  
252 intensity levels associated with the terms 'membrane attack complex' ( $p < 2.18E-04$ ) and  
253 'Immunoglobulin C-domain' ( $p < 2.68E-06$ ) were enriched by 2.27-fold and 2.36-fold in islets  
254 of T2D vs. ND PPP, respectively. Proteins with the gene ontology-term 'differentiation'  
255 ( $p < 3.09E-04$ ) and 'mitochondrion' ( $p < 2.19E-08$ ) were 1.65 and 1.78-fold in islets of ND PPP.

256 T2D patients show decreased levels of plasma phospholipids and  
257 elevated levels of plasma (dihydro-)ceramides.

258  
259 Our study encompassed two independently generated lipidomics data sets. First, shotgun  
260 lipidomics was performed on peripheral blood plasma samples of the aforementioned cohort  
261 (4 ND, 21 IGT and IFG, 13 T3cD and 17 T2D) (Supplementary Tables S9 and S10). Second,  
262 sphingolipid profiling was performed on peripheral blood samples of subjects within the  
263 cohort subjected to transcriptomic analysis (11 ND, 32 IGT and IFG, 26 T3cD and 32 T2D)  
264 (Supplementary Tables S11 and S12). Prior to data analysis, lipidomics samples from PPP  
265 with very high bilirubin values ( $>100 \mu\text{mol/l}$ ) were removed to avoid bias in lipidomics  
266 profiles. All available samples from non-diabetic PPP (ND, as previously defined) and the

267 subset of IGT PPP with HbA1c<6.0 were combined into one group, which is referred to here  
268 as ND for readability.

269

270 In shotgun lipidomics, 113 lipid species from 11 classes were included in the data analysis.  
271 When comparing T2D and T3cD to ND PPP, the majority of lipid classes displayed a  
272 remarkably homogeneous downward-trend of the individual lipid species they comprised  
273 (Fig 5A-B). Most prominently, plasma concentrations of lipids within the phosphatidylcholine  
274 (PC O-) class, a large class with 30 measured species, were lower in T2D versus ND PPP.  
275 Sixteen lipids of this class were significantly decreased (adjusted  $p<0.05$ ) after adjusting for  
276 age and sex differences, with all of them showing at least a 1.4-fold change. Two lipid  
277 species from two smaller phospholipid classes (lysophosphatidylcholines (LPC) and  
278 phosphatidylinositols (PI)), and one from the sphingomyelin class (SM), were also  
279 significantly less abundant in T2D than in ND PPP (LPC 18:0;0: FC=-1.54, adj.  $p=0.03$ ; PI  
280 18:0;0/18:2;0: FC=-1.36, adj.  $p=0.04$ ; SM 34:1;2:, FC=-1.24, adj.  $p=0.04$ ). (Fig. 5A-B and  
281 Supplementary Table S13).

282

283 Next, we performed targeted sphingolipidomics on 14 distinct lipid species for very accurate  
284 plasma level estimation (ceramides, dihydroceramides and sphingoid bases). Plasma levels  
285 of ceramides d18:1/18:0 and d18:1/20:0 were increased in T2D compared to ND PPP (Cer  
286 d18:1/18:0: FC=1.34,  $p=0.02$ ; Cer d18:1/20:0: FC=1.22,  $p=0.01$ ). Of note, a similar trend  
287 towards elevation in T2D vs ND was also observed in the two dihydroceramide species  
288 having the same chain lengths as these ceramides (DH Cer d18:0/18:0: FC=1.44,  $p=0.05$ ;  
289 DH Cer d18:0/20:0: FC=1.35,  $p=0.01$ ). Thus, in our data set, plasma concentrations of  
290 ceramides and their precursor dihydroceramides appear to increase simultaneously in T2D.

291

292 Integrative data modelling identifies cell-matrix interaction, cell signaling  
293 and immune response as key pathways linked to pancreatic islet  
294 dysfunction

295

296 To identify a multivariate molecular profile that explains diabetes progression in the PPP  
297 cohort, we performed a large-scale integrative multi-omics analysis combining clinical data  
298 with islet transcriptomics and plasma lipidomics. Integration of transcriptomics and lipidomics  
299 data in the same model enables to weigh the relative importance of lipid and gene  
300 expression features in relationship to a chosen clinical trait. Hence, we explored the  
301 relationship between gene co-expression modules and plasma lipids by computing a  
302 consensus orthogonal partial least square (consensus OPLS)<sup>29,30</sup> model with HbA1c as the  
303 outcome. All three types of biological data, namely gene co-expression modules, lipids from  
304 shotgun analysis and sphingolipids from targeted analysis, contributed to the model (35%,  
305 46.5% and 18.5%, respectively), suggesting that they help to explain HbA1c levels in a  
306 complementary way. Among them, different lipids and gene modules appear as the most  
307 relevant variables in the statistical modelling of HbA1c levels (Fig. 6A, 6B and  
308 Supplementary Table S14). Importantly, the model explained a large portion of data  
309 variance, highlighting a good fit with the experimental data (see Methods for more details).  
310 Among all considered biological data, the co-expression modules M1, M4, M8, M9, M30,  
311 M35 and M36 were the top predictive variables for high HbA1c levels, along with the two  
312 ceramide species C20 and C18. TAGs were also contributing, although to a lesser extent  
313 (Fig 6A, right hand side). Conversely, low levels of HbA1c were strongly related to the co-  
314 expression modules M12 and M14 (Fig 6A, left hand side). However, the majority of the  
315 predominant predictors for low HbA1c were lipid species, most importantly the PC O-class.  
316 This class was also found to be lower in T2D compared to ND patient groups in differential  
317 abundance analysis, as shown in Fig 5A. A number of SM, PI and PC lipid species were  
318 next in the importance ranking related to low HbA1c, followed by the gene co-expression  
319 module M29. These results suggest that the profile of patients with increased HbA1c is

320 characterized by multiple molecular components, some of which represent signals that were  
321 not captured by differential abundance analyses comparing diabetes status groups nor by  
322 correlating gene co-expression modules individually to HbA1c. Most importantly, consensus  
323 OPLS multi-omics analysis pointed towards additional gene co-expression modules that may  
324 play a role in glucose dysregulation.

325

326 Next, we used the results from the integrative data modelling to infer a network of key  
327 altered biological pathways in dysfunctional beta cells. To this end, we pooled gene modules  
328 positively associated with HbA1c levels (M1, M4, M8, M9, M30, M35 and M36) (Fig. 6A) and  
329 assessed their overlap to KEGG pathways by over-representation analysis. We found that  
330 the biological themes underlying these genes were very similar to the pathways upregulated  
331 in T2D and IGT PPP and include cell-matrix interaction, cell signaling and immune response  
332 (Fig. 6C and Supplementary Table S15). The same strategy was used to identify pathways  
333 associated with genes from modules with a negative prediction score for HbA1c (M12, M14  
334 and M29) (Fig. 6A), revealing an enrichment for metabolic pathways (Fig. 6C and  
335 Supplementary Table S15).

336 Of note, several islet genes dysregulated in T2D PPP were driving the enrichment of these  
337 pathways. These include, for example, *ALDOB*, which stood out for its strong correlation to  
338 HbA1c levels (Fig. 3D and Fig. 6C). These genes, or the proteins encoded by them, should  
339 be regarded as putative candidate biomarkers for monitoring disease progression and  
340 therapeutic intervention.

## 341 Discussion

342 This study provides the most extensive dataset on islets *in situ* and plasma samples from  
343 the largest cohort of in-depth metabolically profiled living donors. Multi-omics data were  
344 generated using state-of-the-art approaches and integrated in a fashion not previously used  
345 in studies on islet dysregulation in relation to hyperglycemia in humans. Our transcriptomic  
346 and proteomic data from islets *in situ* of ND subjects represent a valuable reference for

347 future investigations. Furthermore, we could identify for the first time a set of islet genes  
348 altered in their expression already in subjects with impaired glucose tolerance. This, in turn,  
349 enabled us to acquire an unprecedented cross-sectional overview of the progression of islet  
350 gene dysregulation in parallel with the continuous elevation of HbA1c values, beyond  
351 conventional thresholds for clinical classification of patients.

352

353 Pathways involved in RNA biology and especially in mitochondrial function emerged to be  
354 most negatively perturbed - a conclusion which in the case of the latter was strongly  
355 corroborated by the proteomic analysis, which enabled the identification of known and  
356 unknown differentially expressed proteins in islets of T2D PPP. In this context, we  
357 emphasize the downregulation of mitochondrial ACADS and its paralogue ACADSB, which  
358 catalyze the beta oxidation of short-chain fatty acids, including sodium butyrate. This finding  
359 is intriguing in view of the ability of this metabolite to broadly upregulate gene expression  
360 through inhibition of histone deacetylases. Unlike in previous studies on isolated islets from  
361 brain-dead organ donors<sup>14,18</sup>, the vast majority of differentially expressed genes in islets of  
362 T2D, but also IGT and T3cD PPP were upregulated. Among those genes, *ALDOB* stands  
363 out being the one with the strongest correlation with the islet gene module M9, which in turn  
364 has the strongest correlation with elevated HbA1c. Since *ALDOB* is a marker of beta cell  
365 precursors, its overexpression could be interpreted as a sign that in T2D, mature beta cells  
366 revert back to an immature stage of differentiation, or that a compartment equivalent to the  
367 lifelong niche of virgin beta cells identified in adult mice<sup>31</sup> expands as a potential  
368 compensatory source of new beta cells. However, no additional disallowed gene of  
369 immature beta cells, markers of beta cell precursors or other islet cell types were  
370 dysregulated, while key determinants of mature beta cells, such as *PDX1*, *MAFA*, *NKX6.1* or  
371 *UCN3* were unchanged, at least at the transcriptomic level. Retention of fractions of major  
372 islet cell types (alpha, beta and delta) within the islet in T2D, consistent with recent imaging  
373 studies in samples from pancreatectomized subjects<sup>17</sup>, was confirmed by deconvolution  
374 analysis. Our global unbiased proteomic analysis, which corroborated the upregulation of



375 ALDOB, further showed that the expression profile of islet cells in T2D PPP is very  
376 divergent, opposite to its remarkable homogeneity in islet cells of ND subjects. Hence, the  
377 regression of beta cells toward a de-differentiated state following a linear trajectory  
378 recapitulating their developmental path to maturation or their transdifferentiation into other  
379 islet cell types seems less likely than a disharmonic relaxation of constraints on gene  
380 expression. Such processes, although possibly reversible, could perturb the coordinated  
381 operation of islet cells, including beta cells. In line with this, Lawlor *et al.* reported no  
382 evidence of beta cell dedifferentiation/transdifferentiation and alterations in fractions of islet  
383 cells in the context of T2D upon sequencing of single islet cells from a small cohort of ND  
384 and T2D organ donors<sup>32</sup>. For the future it would be important to assess whether  
385 overexpression of ALDOB occurs indeed in beta cells and if it affects their glycolysis and  
386 metabolism, taking into account that its paralogue ALDOA, whose RNA and protein levels  
387 were unchanged, remains by far the predominant islet aldolase species. Attention may also  
388 be directed toward understanding whether impaired oxidative phosphorylation, as a likely  
389 outcome of the massively decreased expression of mitochondrial proteins, and thus energy  
390 balance homeostasis, accounts, at least in part, for the observed less restrained gene  
391 expression.

392

393 Similar to findings in other population-based studies on T2D<sup>33,34</sup>, PC O- and LPC lipids were  
394 altered in our cohort of T2D PPP, thus supporting the general implications of our  
395 observations. In particular, we found that more than half of the PC O- class lipids (16 out of  
396 30) and two of six LPC lipids were lower in T2D compared to ND PPP. In the present study  
397 we also found that several ceramides and dihydroceramides are elevated in T2D vs. ND,  
398 and whilst these increases were modest, these findings are consistent with those observed  
399 in several other recent studies<sup>35-37</sup>, highlighting the importance of these lipids as potential  
400 biomarkers of beta cell function in T2D.

401



402 Finally, we use a data fusion method<sup>29,30</sup> to generate a model of how different molecular  
403 features (islet gene co-expression, plasma shotgun lipidomics and targeted  
404 sphingolipidomics) contribute to HbA1c levels in a continuum from healthy individuals to  
405 those with overt T2D. This model allowed us to measure the *relative* importance of different  
406 molecular components in explaining HbA1c variability, providing unique insights into the  
407 molecular profiles of individuals as they lose glycemic control towards development of T2D.  
408 To our knowledge this is the first time such an approach has been used in this field and we  
409 suggest that, by modelling multiple levels of information at the same time in deeply  
410 phenotyped populations such as the one presented here, we can gain a holistic view of the  
411 system and draw conclusions regarding key pathways, targets and biomarkers in metabolic  
412 and other diseases.

## 413 Data availability

414 RNA Sequencing data was deposited in the GEO database with GEO accession number (to  
415 be provided once the deposition process is completed)  
416 The proteomics raw datasets and the MaxQuant output files generated and analyzed  
417 throughout this study were deposited at the ProteomeXchange Consortium via the PRIDE  
418 partner repository with the dataset identifier PXD022561  
419 (<https://www.ebi.ac.uk/pride/archive/>).  
420 Lipidomics data will be made publicly available shortly.

## 421 Acknowledgement

422 We wish to thank Leif Groop, Emma Ahlqvist, Stephan Speier and Triantafyllos Chavakis for  
423 discussion; Katja Pfriem for administrative assistance. This project has received funding  
424 from the Innovative Medicines Initiative 2 Joint Undertaking under grant agreement No  
425 115881 (RHAPSODY). This Joint Undertaking receives support from the European Union's  
426 Horizon 2020 research and innovation program and EFPIA. This work is further supported  
427 by the Swiss State Secretariat for Education, Research and Innovation (SERI) under

428 contract number 16.0097-2. The opinions expressed and arguments employed herein do not  
429 necessarily reflect the official views of these funding bodies. Work in the Solimena lab is also  
430 supported with funds from the German Ministry of Education and Research to the German  
431 Center for Diabetes Research (DZD).

432

### 433 **Author contributions**

434 J.W. and M.D., patient recruitment and surgery, provision of clinical data; E.S., N.K. and  
435 D.F., sample collection and processing, data entry; D.A., pathology; M.B., N.K. and E.S.,  
436 patient database management and selection; A-D.B. and M.M., proteomics; M.L., A.D., RNA  
437 sequencing, C.L.Q., P.D., K.S., lipidomics and sphingolipidomics; L.W., M.B., A-D.B., F.Ma.,  
438 F.Me., F.B. and C.K., analysis and integration of multi-omics data; E.B., autoantibody test;  
439 A.S., data in mouse tissue and cell lines; M.B., immunofluorescence stainings and antibody  
440 validation; B.T., D.A., J.W., A.S., M.M., M.I. and M.S., conceptual insights and provision of  
441 funds; L.W., M.B., A-D.B., F.Ma., F.Me., A.S., M.I., M.M. and M.S., writing of the manuscript.  
442 All authors read, revised and approved the final version of the manuscript.

### 443 **Competing interests**

444 The authors declare no conflicts of interest.

445

## 446 References

- 447 1. Saeedi, P. *et al.* Global and regional diabetes prevalence estimates for 2019 and  
448 projections for 2030 and 2045: Results from the International Diabetes Federation  
449 Diabetes Atlas, 9th edition. *Diabetes Res. Clin. Pract.* **157**, (2019).
- 450 2. Mizera, M. *et al.* Type 2 Diabetes Remission 5 Years After Laparoscopic Sleeve  
451 Gastrectomy: Multicenter Cohort Study. *Obes. Surg.* 1–7 (2020). doi:10.1007/s11695-  
452 020-05088-w
- 453 3. Lim, E. L. *et al.* Reversal of type 2 diabetes: Normalisation of beta cell function in  
454 association with decreased pancreas and liver triacylglycerol. *Diabetologia* **54**, 2506–  
455 2514 (2011).
- 456 4. Talchai, C., Xuan, S., Lin, H. V., Sussel, L. & Accili, D. Pancreatic  $\beta$  cell  
457 dedifferentiation as a mechanism of diabetic  $\beta$  cell failure. *Cell* **150**, 1223–1234  
458 (2012).
- 459 5. Wang, Z., York, N. W., Nichols, C. G. & Remedi, M. S. Pancreatic  $\beta$  cell  
460 dedifferentiation in diabetes and redifferentiation following insulin therapy. *Cell Metab.*  
461 **19**, 872–882 (2014).
- 462 6. Cinti, F. *et al.* Evidence of  $\beta$ -Cell Dedifferentiation in Human Type 2 Diabetes. *J. Clin.*  
463 *Endocrinol. Metab.* **101**, 1044–1054 (2016).
- 464 7. American Diabetes Association. Classification and diagnosis of diabetes: Standards  
465 of Medical Care in Diabetes-2020. *Diabetes Care* **43**, S14–S31 (2020).
- 466 8. Barovic, M. *et al.* Metabolically phenotyped pancreatectomized patients as living  
467 donors for the study of islets in health and diabetes. *Molecular Metabolism* **27**, S1–S6  
468 (2019).
- 469 9. Poitout, V. *et al.* A call for improved reporting of human islet characteristics in  
470 research articles. *Diabetes* **68**, 209–211 (2019).
- 471 10. Ebrahimi, A. *et al.* Evidence of stress in  $\beta$  cells obtained with laser capture  
472 microdissection from pancreases of brain dead donors. *Islets* **9**, 19–29 (2017).
- 473 11. Toyama, H., Takada, M., Suzuki, Y. & Kuroda, Y. Activation of macrophage-

- 474 associated molecules after brain death in islets. *Cell Transplant.* **12**, 27–32 (2003).
- 475 12. Negi, S. *et al.* Analysis of Beta-Cell gene expression reveals inflammatory signaling  
476 and evidence of dedifferentiation following human islet isolation and culture. *PLoS*  
477 *One* **7**, 1–11 (2012).
- 478 13. Weir, G. C. Glucolipotoxicity,  $\beta$ -cells, and diabetes: The emperor has no clothes.  
479 *Diabetes* **69**, 273–278 (2020).
- 480 14. Solimena, M. *et al.* Systems biology of the IMIDIA biobank from organ donors and  
481 pancreatctomised patients defines a novel transcriptomic signature of islets from  
482 individuals with type 2 diabetes. *Diabetologia* **61**, 641–657 (2018).
- 483 15. Gerst, F. *et al.* The Expression of Aldolase B in Islets is Negatively Associated with  
484 Insulin Secretion in Humans. *J. Clin. Endocrinol. Metab.* **103**, 4373–4383 (2018).
- 485 16. Khamis, A. *et al.* Laser capture microdissection of human pancreatic islets reveals  
486 novel eQTLs associated with type 2 diabetes. *Mol. Metab.* **24**, 98–107 (2019).
- 487 17. Cohrs, C. M. *et al.* Dysfunction of Persisting  $\beta$  Cells Is a Key Feature of Early Type 2  
488 Diabetes Pathogenesis. *Cell Rep.* **31**, (2020).
- 489 18. Mahajan, A. *et al.* Fine-mapping type 2 diabetes loci to single-variant resolution using  
490 high-density imputation and islet-specific epigenome maps. *Nat. Genet.* **50**, 1505–  
491 1513 (2018).
- 492 19. Taneera, J. *et al.* Identification of novel genes for glucose metabolism based upon  
493 expression pattern in human islets and effect on insulin secretion and glycemia. *Hum.*  
494 *Mol. Genet.* **24**, 1945–1955 (2014).
- 495 20. Carrat, G. R. *et al.* Decreased STARD10 Expression Is Associated with Defective  
496 Insulin Secretion in Humans and Mice. *Am. J. Hum. Genet.* **100**, 238–256 (2017).
- 497 21. Xin, Y. *et al.* RNA Sequencing of Single Human Islet Cells Reveals Type 2 Diabetes  
498 Genes. *Cell Metab.* **24**, 608–615 (2016).
- 499 22. Langfelder, P. & Horvath, S. WGCNA: An R package for weighted correlation network  
500 analysis. *BMC Bioinformatics* **9**, 559 (2008).
- 501 23. Haythorne, E. *et al.* Diabetes causes marked inhibition of mitochondrial metabolism in

- 502 pancreatic  $\beta$ -cells. *Nat. Commun.* **10**, (2019).
- 503 24. Meier, F. *et al.* Online parallel accumulation–serial fragmentation (PASEF) with a  
504 novel trapped ion mobility mass spectrometer. *Mol. Cell. Proteomics* **17**, 2534–2545  
505 (2018).
- 506 25. Thorens, B. GLUT2, glucose sensing and glucose homeostasis. *Diabetologia* **58**,  
507 221–232 (2015).
- 508 26. Pipatpolkai, T., Usher, S., Stansfeld, P. J. & Ashcroft, F. M. New insights into KATP  
509 channel gene mutations and neonatal diabetes mellitus. *Nature Reviews*  
510 *Endocrinology* **16**, 378–393 (2020).
- 511 27. Wiśniewski, J. R., Hein, M. Y., Cox, J. & Mann, M. A ‘proteomic ruler’ for protein copy  
512 number and concentration estimation without spike-in standards. *Mol. Cell.*  
513 *Proteomics* **13**, 3497–3506 (2014).
- 514 28. Cox, J. & Mann, M. 1D and 2D annotation enrichment: a statistical method integrating  
515 quantitative proteomics with complementary high-throughput data. *BMC*  
516 *Bioinformatics* **13 Suppl 16**, (2012).
- 517 29. Boccard, J. & Rutledge, D. N. A consensus orthogonal partial least squares  
518 discriminant analysis (OPLS-DA) strategy for multiblock Omics data fusion. *Anal.*  
519 *Chim. Acta* **769**, 30–39 (2013).
- 520 30. Boccard, J. & Rutledge, D. N. Iterative weighting of multiblock data in the orthogonal  
521 partial least squares framework. *Anal. Chim. Acta* **813**, 25–34 (2014).
- 522 31. van der Meulen, T. *et al.* Virgin Beta Cells Persist throughout Life at a Neogenic Niche  
523 within Pancreatic Islets. *Cell Metab.* **25**, 911-926.e6 (2017).
- 524 32. Lawlor, N. *et al.* Single-cell transcriptomes identify human islet cell signatures and  
525 reveal cell-type-specific expression changes in type 2 diabetes. *Genome Res.* **27**,  
526 208–222 (2017).
- 527 33. Wang-Sattler, R. *et al.* Novel biomarkers for pre-diabetes identified by metabolomics.  
528 *Mol. Syst. Biol.* **8**, (2012).
- 529 34. Suvitaival, T. *et al.* Lipidome as a predictive tool in progression to type 2 diabetes in

- 530 Finnish men. *Metabolism*. **78**, 1–12 (2018).
- 531 35. Wigger, L. *et al.* Plasma Dihydroceramides Are Diabetes Susceptibility Biomarker  
532 Candidates in Mice and Humans. *Cell Rep*. **18**, 2269–2279 (2017).
- 533 36. Haus, J. M. *et al.* Plasma ceramides are elevated in obese subjects with type 2  
534 diabetes and correlate with the severity of insulin resistance. *Diabetes* **58**, 337–343  
535 (2009).
- 536 37. Kopprasch, S. *et al.* Detection of independent associations of plasma lipidomic  
537 parameters with insulin sensitivity indices using data mining methodology. *PLoS One*  
538 **11**, (2016).
- 539
- 540

## 541 Material and methods

### 542 Cohort

543 Our cohort comprised 133 adult surgical patients from the University Hospital Carl Gustav  
544 Carus Dresden who after informed consent participated in this study over a period of 5  
545 years. Based on the thresholds set by the American Diabetes Association<sup>7</sup> (ADA) for fasting  
546 glucose, HbA1c and 2-hour glycemia of an oral glucose tolerance test (OGTT) in the days  
547 immediately before surgery 18 of these patients were classified as non-diabetic (ND), 41  
548 with impaired glucose tolerance (IGT), including 3 with impaired fasting glucose (IFG) only,  
549 35 with Type 3c Diabetes (T3cD) and 39 with Type 2 Diabetes (T2D). A diagnosis of T3cD  
550 was made whenever the occurrence of diabetes was not recognized for longer than 1 year  
551 prior to the onset of the symptoms leading to surgery and the subject was negative for the  
552 presence of circulating autoantibodies against pancreatic islets, which were assessed as  
553 previously described<sup>14</sup>. In all analyses IFG and IGT subjects were merged in one group  
554 hereinafter labeled as IGT PPP. Medical and family history and relevant clinical biochemistry  
555 data available from the routine medical processing of the patients were retrieved from the  
556 hospital database and referring physicians. Patients who underwent neoadjuvant  
557 chemotherapy as well as those with endocrine neoplasms of the pancreas were excluded  
558 from this study.

### 559 Human pancreatic tissue and peripheral blood processing

560 Surgical tissue specimens were examined by a certified pathologist immediately after  
561 resection as per regular clinical procedures. Fragments of healthy pancreatic tissue from the  
562 resection margins were excised, snap frozen in liquid nitrogen and stored at -80°C either  
563 natively or embedded in TissueTek OCT compound. Estimated warm and cold ischaemia  
564 time was on average 2 hours. Peripheral blood samples were stored at -80°C in aliquots of  
565 full blood, plasma and serum.

## 566 Transcriptomics

### 567 Islet procurement and RNA isolation

568 Pancreatic tissue was sectioned in a cryostat and mounted on UV pre-treated Zeiss  
569 MembraneSlide 1.0 PEN slides. Laser capture microdissection (LCM) was done with a Zeiss  
570 Palm MicroBeam system using autofluorescence to identify islets, as previously described<sup>38</sup>.  
571 RNA was isolated from approximately 20x6µm<sup>3</sup> of islet tissue using the Arcturus PicoPure  
572 RNA Isolation Kit. Only preparations with RNA Integrity Number ≥5 were used for RNA  
573 sequencing. The entire handling of the tissue samples was done in a strictly RNase free  
574 environment.

### 575 Library preparation, RNA Sequencing and alignment

576 Sequencing libraries were prepared from bulk RNA using the Illumina SmartSeq protocol.  
577 Single ended 76bp sequencing was done with an Illumina HiSeq 2500 or Illumina HiSeq 500  
578 at the Next Generation Sequencing Core Facility of the CMCB Dresden, with the target  
579 depth of 35 million fragments per library. From FASTQ files, purity-filtered reads were  
580 trimmed with Cutadapt to remove adapters and low-quality sequences (v. 1.8)<sup>39</sup>. Reads  
581 matching to ribosomal RNA sequences were removed with fastq\_screen (v. 0.11.1)<sup>40</sup>.  
582 Remaining reads were further filtered for low complexity with reaper (v. 15-065)<sup>41</sup>. Reads  
583 were aligned against Homo sapiens GRCh38.92 genome using STAR (v. 2.5.3a)<sup>42</sup>. The  
584 number of read counts per gene locus was summarized with htseq-count (v. 0.9.1)<sup>43</sup> using  
585 Homo sapiens GRCh38.92 gene annotation. Quality of the RNA-seq data alignment was  
586 assessed using RSeQC (v. 2.3.7)<sup>44</sup>.

### 587 RNA Sequencing quality control, processing and differential expression analysis

588 RNA Sequencing datasets were screened for exocrine contamination in an initial quality  
589 control (QC) step. Analysis of the absolute number of detected expressed genes, gene body  
590 coverage and cumulative gene diversity assessment flagged a number of libraries to be of  
591 insufficient quality for downstream analysis. Libraries were filtered for minimal expression by  
592 removal of genes with less than 5 mean raw reads. Reads were normalized for library size



593 and transformed for variance stabilizing using tools from the DESeq2 Bioconductor  
594 package<sup>45</sup>. Further analysis revealed 41 libraries in which transcripts other than insulin (INS)  
595 displayed the highest normalized number of reads. Differential expression analysis across  
596 the clinical categories (ND, IGT, T3cD, T2D) was performed using limma function with voom  
597 approach from limma Bioconductor package<sup>46,47</sup> on both the full dataset of 133 libraries  
598 which passed the QC analysis as well as on the “restricted” dataset of 92 libraries featuring  
599 INS as the highest expressed gene based on the linear model with age, gender and BMI as  
600 covariates.

601 Gene set enrichment analysis of differentially expressed genes  
602 Functional enrichment analyses of differentially expressed genes in IGT, T2D or T3cD  
603 compared to ND patients were performed by weighted gene set enrichment analysis (GSEA)  
604 on unfiltered gene lists ranked by decreasing differential expression test statistics. Gene  
605 Ontology (GO) term and Kyoto Encyclopedia of Genes and Genomes (KEGG) pathway  
606 collections were restricted to gene sets with a minimum and maximum sizes of 100 and 500,  
607 respectively. The enrichment scores were normalized by gene set size and their statistical  
608 significance was assessed by permutation test ( $n=1,000$ ). GO enrichment analyses were  
609 carried out using the gseGO function from the R package clusterProfiler (version 3.10.1)<sup>48</sup>.  
610 GO terms enriched in at least one comparison were identified using  $p$  value and normalized  
611 enrichment score thresholds  $< 0.01$  and  $> 2.5$ , respectively. Redundancy of enriched GO  
612 terms was removed using the clusterProfiler simplify function (selecting the most  
613 representative term by  $p$  value) and enrichment maps generated using the emapplot function  
614 from the R package enrichplot (version 1.2.0). KEGG pathway enrichment analyses were  
615 performed using the clusterProfiler gseKEGG function. Results were filtered based on a  $p$   
616 value threshold  $< 0.01$  and a normalized enrichment score threshold  $> 2$ . To simplify results  
617 visualization and interpretation, redundant KEGG pathways were also collapsed into fewer  
618 biological themes using the enrichment map visualizations.

## 619 Weighted Gene Correlation Network Analysis

### 620 Gene Co-expression Network Construction

621 The gene co-expression network was created following the weighted gene correlation  
622 network analysis (WGCNA) protocol as implemented in the WGCNA package in R (version  
623 1.68)<sup>22</sup>, as previously described<sup>14</sup>. WGCNA was performed on batch-corrected, normalized  
624 and variance stabilizing transformed expression data from the full cohort of 133 subjects.  
625 The co-expression network was constructed by calculating an adjacency matrix using  
626 Pearson correlation, pairwise complete observations and unsigned method. The soft-  
627 threshold parameter was optimized with the function pickSoftThreshold and the best  
628 threshold ( $\alpha = 7$ ) selected by visual inspection. The adjacency matrix was then computed  
629 into a topological overlap matrix (TOM), converted to distances, and clustered by  
630 hierarchical clustering using average linkage clustering. Modules were identified by dynamic  
631 tree cut using the hybrid method and parameters `minClusterSize=20` and `deepSplit=2`.  
632 Similar modules were merged using a module eigengene distance of 0.15 as the threshold.

### 633 Identification of co-expressed gene modules related to diabetes trait

634 We correlated the module eigengenes to clinical traits using Spearman correlation (pairwise  
635 complete observations) and calculated the corresponding  $p$  values using the `cor` and  
636 `corPvalueStudent` functions from the WGCNA package, respectively. Module-trait  
637 correlations were represented as heatmap using the `labeledHeatmap` function from the  
638 WGCNA package. The modules displaying the most positive or negative correlation to  
639 HbA1c were further analysed. Normalized and variance stabilizing transformed gene counts  
640 for selected modules were plotted as heatmap using the `heatmap.2` function from the R  
641 `gplots` package (version 3.0.1.2). Rows (representing genes) were scaled and hierarchically  
642 clustered by Euclidean distances. Columns, representing patients, were custom ordered as  
643 described in the legend of figure 3. Module hub genes, such as highly connected genes  
644 within a module that could have a strong influence on a phenotypic trait, were identified as

645 those with the highest correlation with the particular trait and the highest correlation with the  
646 module eigengene.

#### 647 Significance of gene co-expression modules

648 We tested the significance of the co-expression modules by comparing their intramodular  
649 connectivity (connectivity between nodes within the same module, as computed by the  
650 WGCNA `intramodularConnectivity` function) to the background as follows. For each selected  
651 module of size  $N$ , we calculated a Z-score as:

$$652 \quad Z = (k - \mu) / \sigma$$

653 where  $k$  is the intramodular connectivity and  $\mu$  and  $\sigma$  are the mean and standard deviation of  
654 the intramodular connectivity from 1,000 randomly sampled modules of size  $N$  respectively.  
655 Empirical  $p$  values were then calculated as the fraction of random intramodular connectivity  
656 values  $\geq$  to the observed intramodular connectivity. For the modules with the highest  
657 variable importance in projection score in the HbA1c multiblock model, all of the random  
658 intramodular connectivity values were below the observed intramodular connectivity,  
659 suggesting that these modules were more compact than modules assembled by randomly  
660 sampling the same number of genes from the expression data (Supplementary Table S7).

#### 661 Functional profiles of gene modules with best prediction score for HbA1c

662 The `clusterProfiler` `enrichKEGG` function was used to test for the over representation of  
663 selected co-expressed gene modules in KEGG pathways using hypergeometric distribution.  
664 A  $p$  value threshold  $< 0.01$  was used to identify enriched terms. Enrichment map  
665 visualizations were used to overcome gene set redundancy. Results were displayed as  
666 networks of enriched pathways and overlapping genes using `cytoscape` (version 3.5.1).

#### 667 Deconvolution analysis

668 In all samples a cell proportions matrix was produced using the R package `DeconRNASeq`  
669 (v.1.26.0) on RPKM-transformed data. The signature file provided to `DeconRNASeq` comes

670 from Xin et al. (2016)<sup>21</sup>, Supplementary Table S2 (A), obtained using single-cell data. It was  
671 adapted to the human genome version 38 by excluding 15 obsolete genes.

## 672 Lipidomics

### 673 Sample availability and sample overlap with transcriptomics data

674 Pre-operative plasma lipidomics samples were obtained from a subset of the PPP cohort.  
675 Shotgun lipidomics analysis was performed on plasma from 55 PPP. These included 53  
676 subjects who also had their islet transcriptomics profile included in this study plus two PPP  
677 who were not part of the transcriptomics analysis because the RNA-Seq data failed to pass  
678 the quality control. Moreover, targeted sphingolipid analysis was performed on plasma from  
679 101 PPP. These included 98 PPP whose transcriptomics data was also included in this  
680 study plus three PPP whose RNA-Seq data was excluded for quality reasons. The number  
681 of samples in the two types of lipidomics analysis was smaller than in islet transcriptomic  
682 analysis because of the limited availability of plasma samples.

683

### 684 Shotgun lipidomics measurements

685 A streamlined mass-spectrometry (MS) -based platform for shotgun lipidomics developed by  
686 Lipotype GmbH (Dresden, Germany) was used for lipidomic profiling of patient plasma  
687 samples. Lipid extraction, internal standard addition and infusion into the mass spectrometer  
688 were performed as previously described<sup>49</sup>. The internal standard mixture contained:

689 cholesterol D6 (chol), cholesterol ester 20:0 (CE), ceramide 18:1;2/17:0 (Cer), diacylglycerol  
690 17:0/17:0 (DAG), phosphatidylcholine 17:0/17:0 (PC), phosphatidylethanolamine 17:0/17:0  
691 (PE), lysophosphatidylcholine 12:0, (LPC) lysophosphatidylethanolamine 17:1 (LPE),  
692 triacylglycerol 17:0/17:0/17:0 (TAG) and sphingomyelin 18:1;2/12:0 (SM).

693 Samples were analyzed by direct infusion in a QExactive mass spectrometer (Thermo  
694 Scientific) in a single acquisition. Tandem mass-spectrometry (MS/MS) was triggered by an  
695 inclusion list encompassing corresponding MS mass ranges scanned in 1 Da increments.  
696 MS and MS/MS data were combined to monitor CE, DAG and TAG ions as ammonium

697 adducts; PC, PC O-, as acetate adducts; and PE, PE O- and PI as deprotonated anions. MS  
698 only was used to monitor LPE as deprotonated anion; Cer, SM and LPC as acetate adducts  
699 and cholesterol as ammonium adduct.

700 Data post-processing and normalization were performed using an in-house developed data  
701 management system. Only lipid identifications with a signal-to-noise ratio >5 and a signal  
702 intensity 5-fold higher than in corresponding blank samples were considered for further  
703 analysis.

#### 704 Targeted sphingolipid measurements

705 Ceramides (C16:0 cer, C18:0 cer, C18:1 cer, C20:0 cer, C22:0 cer, C24:0 cer and C24:1  
706 cer), Dihydroceramides (C16:0 DHcer, C18:0 DHcer, C18:1 DHcer, C20:0 DHcer, C22:0  
707 DHcer, C24:0 DHcer, C24:1 DHcer) and precursors (Sphingosine, Sphinganine, 1-  
708 Deoxysphinganine, 1-Methyldeoxysphinganine, SB) were quantified in plasma by liquid  
709 chromatography tandem mass spectrometry (LC-MC/MC). In addition to samples, seven-  
710 point calibration curves and 3 levels of quality controls were made from pure standards in  
711 BSA 5%. Finally, reference plasma spiked with analytes at two different levels were  
712 prepared as additional QC samples.

713 After lipid chromatographic separation on a UPLC I-Class system (Waters), mass analysis  
714 was performed on an API 6500 system (Sciex) operating with an electrospray source in  
715 positive mode. General parameters were set as follows: curtain gas: N<sub>2</sub> (35 PSI), Ion source  
716 gas 1: Air (50 PSI), Ion source gas 2: Air (50 PSI), ion source voltage: 5500 V, temperature:  
717 300°C, collision gas: N<sub>2</sub> (7). Scheduled multiple reaction monitoring (MRM) mode was used  
718 with a target scan time of 0.5s and an MRM detection window of 60s.

719 Data was acquired using Analyst 1.6.2 (Sciex) and data processing was performed with  
720 MultiQuant 3.0 (Sciex). Peak area of analyte and internal standard were determined by the  
721 MultiQuant 3.0 (Sciex) integration system. Analyte concentrations were determined using  
722 the internal standard method. The standard curves were generated from the peak area  
723 ratios of analyte/internal standard using linear regression analysis with 1/x<sup>2</sup> weighting

724 (except for C24 cer: quadratic regression analysis). Quantifications of analytes were  
725 accepted based on quality control samples. A tolerance of 25% and 30% was applied for  
726 accuracy and precision of QC samples and spiked plasma samples, respectively. All  
727 concentrations were reported in ng/mL.

#### 728 Statistical analysis of shotgun lipidomics and targeted sphingolipid data

729 The statistical analyses of the shotgun lipidomics and targeted sphingolipid data sets were  
730 kept separate. Identical analysis steps were applied to the two data sets. Both sets had  
731 missing data values. Lipid species with  $\geq 25\%$  missing values across all available plasma  
732 samples were removed from the data set. This filtering resulted in 113 lipid species that  
733 were kept in the shotgun data set (523 were removed) and 14 in the targeted data set (4  
734 were removed). For the lipids that remained in the data sets, missing values were imputed  
735 using a random forest approach, applying the function `missForest` from the R package  
736 `missForest`, with default parameters. In a next step, samples were filtered based on subject  
737 characteristics: individuals with bilirubin levels  $\geq 100$   $\mu\text{mol/l}$  were removed before all analysis;  
738 moreover, individuals categorized as IGT with an  $\text{HbA1c} \geq 6\%$  were excluded from the group  
739 comparisons in differential analysis, but they were retained in other analyses involving  
740 lipidomics data. In differential analysis, due to the limited number of available ND samples,  
741 the ND and the included IGT samples were combined into a single group for comparison  
742 with other sample groups, as described in the result section.

743 For differential analysis, linear models were applied, using the function `lm` from the R stats  
744 package. For each comparison between two sample groups, a linear model that included  
745 diabetes status as the main explanatory variable and age and sex as covariates was fitted to  
746 the data from the two groups. P values for diabetes status were adjusted across all included  
747 lipid species with the Benjamini-Hochberg method, separately for each comparison.

## 748 Integrative analysis of transcriptomics and lipidomics

### 749 Multiblock modeling

750 Consensus Orthogonal Partial Least Squares (OPLS) model was computed with the  
751 MATLAB 9 environment with combinations of toolboxes and in-house functions that are  
752 available at <https://gitlab.unige.ch/Julien.Boccard/consensusopls>. Modified RV-coefficients  
753 were computed with the publicly available MATLAB m-file<sup>50</sup>. KOPLS-DA was assessed with  
754 routines implemented in the KOPLS open source package<sup>51</sup>. Consensus OPLS modeling  
755 was performed on shotgun lipidomics, targeted sphingolipids and transcriptomics data  
756 tables, which were all autoscaled prior to the analysis. The Consensus OPLS model  
757 distinguishes variation of data that is correlated to Y response and those which is orthogonal  
758 to Y response. This eases the biological interpretation of results and enables the link  
759 between variation of variables and variation of the outcome while removing information  
760 coming from other sources of variation.

761 The model resulted in 3 components, of which 1 predictive latent variable and 2 orthogonal  
762 latent variables. The quality of the model was assessed by  $R^2$  and  $Q^2$  values, which define  
763 the portion of data variance explained by the model and the predictive ability of the model,  
764 respectively. The predictive component carried 11% of the total explained variance of global  
765 data ( $R^2X$ ) and explained 51.7% of variation of HbA1c ( $R^2Y$ ). This indicates that the model  
766 was able to explain a large part of variation of the response variable based on the different  
767 data matrices. The  $Q^2$  value was computed by a K-fold cross validation ( $K=7$ ), which led to a  
768 goodness of prediction of  $Q^2 = 0.26$ .

769 To ensure the validity of the model, a series of 1,000 permutation tests were carried out by  
770 mixing randomly the original Y response (HbA1c patient values). The true model  $Q^2$  value  
771 was clearly distinguished and statistically different from the random models distribution  
772 ( $p < 0.001$ , mean = -0.1778, standard deviation (SD) = 0.150,  $n = 1,000$ ). The variable relevance  
773 to explain the HbA1c variation was evaluated using the variable importance in projection  
774 (VIP) parameter, which reflects the importance of variables both with respect to the



775 response and to the projection quality. The most relevant features were selected using a VIP  
776 threshold > 1.2.

## 777 Proteomics

### 778 Sample Preparation

779 Pooled pancreatic islet cells with an approximate surface area of 80,000  $\mu\text{m}^2$  were collected  
780 via Laser Capture Microdissection (LCM) onto adhesive cap tubes. Isolates were  
781 reconstituted in a 20  $\mu\text{l}$  lysis buffer (PreOmics, Germany) and transferred into PCR tubes<sup>52</sup>.  
782 Samples were boiled at 95°C for 1min to denature proteins and reduce and alkylate  
783 cysteines without shaking in a thermocycler (Eppendorf GmbH) followed by sonication at  
784 maximum power (Bioruptor, Diagenode, Belgium) for 10 cycles of 30sec sonication and  
785 30sec cooldown each. Sample liquid was briefly spun down and boiled again for 10min  
786 without shaking. 20 $\mu\text{l}$  of 100mM TrisHCl pH 8.5 (1:1 v/v) and 20ng Trypsin/LysC were added  
787 to each sample, followed by overnight digestion at 30°C without shaking. Next day, 40 $\mu\text{l}$   
788 99% Isopropanol 5% Trifluoroacetic acid (TFA) (1:1 v/v) was added to the solution and  
789 mixed by sonication. Samples were then subjected to stage-tip cleanup via  
790 styrenedivinylbenzene reversed-phase sulfonate (SDB-RPS). Sample liquid was loaded on  
791 one 14-gauge stage-tip plug. Peptides were cleaned up with 2x200 $\mu\text{l}$  99% Isopropanol 5%  
792 TFA and 2x200 $\mu\text{l}$  99% ddH<sub>2</sub>O 5% TFA in an in-house made Stage-tip centrifuge at 2,000xg,  
793 followed by elution in 40 $\mu\text{l}$  80% Acetonitrile, 5% Ammonia and dried at 45°C in a SpeedVac  
794 centrifuge (Eppendorf, Concentrator plus) according to the 'in-StageTip' protocol (PreOmics,  
795 Germany). Peptides were resuspended in 0.1% TFA, 2% ACN, 97.9% ddH<sub>2</sub>O.

### 796 Liquid chromatography and mass spectrometry (LC-MS)

797 LC-MS was performed with an EASY nanoLC 1200 (Thermo Fisher Scientific) coupled  
798 online to a trapped ion mobility spectrometry quadrupole time-of-flight mass spectrometer  
799 (timsTOF Pro, Bruker Daltonik GmbH, Germany) via nano-electrospray ion source (Captive  
800 spray, Bruker Daltonik GmbH). Peptides were loaded on a 50cm in-house packed HPLC-



801 column (75 $\mu$ m inner diameter packed with 1.9 $\mu$ m ReproSil-Pur C18-AQ silica beads, Dr.  
802 Maisch GmbH, Germany). Sample analytes were separated using a linear 120min gradient  
803 from 5-30% buffer B in 95min followed by an increase to 60% for 5min, and by a 5min wash  
804 at 95% buffer B at 300nl/min (Buffer A: 0.1% Formic Acid, 99.9% ddH<sub>2</sub>O; Buffer B: 0.1%  
805 Formic Acid, 80% CAN, 19.9% ddH<sub>2</sub>O). The column temperature was kept at 60°C by an in-  
806 house manufactured oven.

807 Mass spectrometry analysis was performed in a data-dependent PASEF mode with 1 MS1  
808 survey TIMS-MS and 10 PASEF MS/MS scans per acquisition cycle. Ion accumulation and  
809 ramp time in the dual TIMS analyzer was set to 100ms each and we analyzed the ion  
810 mobility range from  $1/K_0 = 1.6 \text{ Vs cm}^{-2}$  to  $0.6 \text{ Vs cm}^{-2}$ . Precursor ions for MS/MS analysis  
811 were isolated with 2Th windows for  $m/z < 700$  and 3Th for  $m/z > 700$  in a total  $m/z$  range of  
812 100-1,700 by synchronizing quadrupole switching events with the precursor elution profile  
813 from the TIMS device. The collision energy was lowered linearly as a function of increasing  
814 mobility starting from 59 eV at  $1/K_0 = 1.6 \text{ VS cm}^{-2}$  to 20 eV at  $1/K_0 = 0.6 \text{ Vs cm}^{-2}$ . Singly  
815 charged precursor ions were excluded with a polygon filter (otof control, Bruker Daltonik  
816 GmbH). Precursors for MS/MS were picked at an intensity threshold of 2.500 a.u. and  
817 resequenced until reaching a 'target value' of 20,000 a.u taking into account a dynamic  
818 exclusion of 40sec elution<sup>24</sup>.

#### 819 Proteomics raw file processing

820 Raw files were searched against the human Uniprot databases (UP000005640\_9606.fa,  
821 UP000005640\_9606\_additional.fa) MaxQuant (Version 1.6.7), which extracts features from  
822 four-dimensional isotope patterns and associated MS/MS spectra<sup>53</sup>. False-discovery rates  
823 were controlled at 1% both on peptide spectral match (PSM) and protein level. Peptides with  
824 a minimum length of seven amino acids were considered for the search including N-terminal  
825 acetylation and methionine oxidation as variable modifications and cysteine  
826 carbamidomethylation as fixed modification, while limiting the maximum peptide mass to

827 4,600 Da. Enzyme specificity was set to trypsin cleaving c-terminal to arginine and lysine. A  
828 maximum of two missed cleavages were allowed. Maximum precursor and fragment ion  
829 mass tolerance were searched as default for TIMS-DDA data, while the main search peptide  
830 tolerance was set to 20ppm. The median absolute mass deviation for the data was 0.68ppm.  
831 Peptide identifications by MS/MS were transferred by matching four-dimensional isotope  
832 patterns between the runs with a 0.7-min retention-time match window and a 0.05 1/K<sub>0</sub> ion  
833 mobility window<sup>54</sup>. Label-free quantification was performed with the MaxLFQ algorithm and a  
834 minimum ratio count of 1<sup>55</sup>.

### 835 Bioinformatic analysis

836 Bioinformatics analysis was performed in Perseus (version 1.6.7.0 and 1.5.5.0) and  
837 GraphPad Prism (version 8.2.1)<sup>56</sup>. Reverse database, contaminant, and only by site  
838 modification identifications were removed from the dataset. Data were grouped by analytical  
839 replicates and filtered to at least 70% data completeness in one group. Missing values were  
840 imputed from a normal distribution with a downshift of 1.8 and a width of 0.3 and data were  
841 log<sub>2</sub>-transformed. To represent the data reproducibility and variability, a principal component  
842 analysis was performed on the median data of analytical replicate measurements of each  
843 individual. Clinically classified T2D and ND individuals were tested for differences in their  
844 mean by a two-sided Student's t-test with S<sub>0</sub>=0.1 and a Benjamini-Hochberg correction for  
845 multiple hypothesis testing at an FDR of 0.05 preserving grouping of each individuals  
846 analytical replicate measurements, and presented as volcano plot. We then normalized the  
847 data by row-wise z-scoring followed by hierarchical clustering using Euclidean as the  
848 distance parameter for column- and row-wise clustering. 1D gene ontology enrichments of  
849 clustered and systematically changed proteins were performed with regards to their cellular  
850 compartment and keywords assignment<sup>28</sup>. Log<sub>2</sub> transformed LFQ data were used for the  
851 calculation of intensity shifts of the enriched keyword or cellular compartment term for each  
852 of the displayed clusters. Total protein copy number estimation of the median LFQ  
853 intensities for patients clinically classified as non-diabetic and diabetic were calculated using

854 the Perseus plugin 'Proteomic ruler'<sup>27</sup>. Median LFQ intensity values for all T2D and ND were  
855 calculated. We annotated protein groups for the leading protein ID with the human Uniprot  
856 fasta file (UP000005640\_9606.fa) and estimated the protein copy number with the following  
857 settings: Averaging mode: 'All columns separately', Molecular masses: 'Average molecular  
858 mass', Detectability correction: 'Number of theoretical peptides', Scaling mode: 'Histone  
859 proteomic ruler', Ploidy: '2', Total cellular protein concentration: '200g/l'. Proteins were  
860 annotated with regards to their cellular compartment by gene ontology. We calculated the  
861 median protein copy number for the samples from T2D and ND PPP separately and  
862 multiplied it by its protein mass. To calculate the subcellular protein mass contribution, we  
863 calculated the protein mass proportion for the GOCC terms 'Nucleus', 'Mitochondrion',  
864 'Cytoskeleton', 'Golgi apparatus', and 'Endoplasmic reticulum'. For calculating the organellar  
865 change between T2D and ND PPP, protein mass contributions of each organelle were  
866 normalized by its respective 'Nuclear part' contribution. Chromosomal annotation of  
867 significantly changed proteins between T2D and ND PPP was identified via Ensembl ID.

## 868 Antibody validation

869 Rabbit polyclonal anti-ALDOB antibody (Proteintech, Cat.No. 18065-1-AP) was tested for  
870 specificity by western blotting of protein extracts of *ALDOB*<sup>-/-</sup> MIN6 cells generated with a  
871 CRISPR/Cas9 system, as described<sup>52</sup>. The knock-out of *ALDOB* was verified by Sanger  
872 sequencing of the target locus.

## 873 Isolated mouse islet and cell line experiments

874 Mouse (C57Bl6, db/db and db/+ mice, 3 animals/strain, age 13 weeks) islets were cultured  
875 for 1 day post isolation. Islet beta MIN6s4 and alpha  $\alpha$ TC1- clone 6 cell lines were harvested  
876 for RNA extraction using Qiagen RNeasy Mini Kit according to the manufacturer's  
877 instructions. After quality control, RNA samples were sequenced using the Illumina HiSeq  
878 2000 platform and processed as previously described<sup>45,57,58</sup>.

## 879 Immunofluorescence microscopy

880 Immunofluorescence staining was done on formalin-fixed paraffin embedded 5µm thick  
881 sections of human pancreatic tissue. Acetylated histone H3 and H4 were detected in  
882 separate sections using rabbit polyclonal antibodies (Merck Millipore Cat.No. 06-598 and 06-  
883 599, respectively). A mouse monoclonal anti-insulin antibody (Thermo Fisher Scientific  
884 Cat.No. 53-9769-82) was used for co-staining, to identify the beta cell areas. Images were  
885 acquired using a Nikon C2+ confocal microscope with a 60x oil immersion objective, with  
886 acquisition parameters normalized to a negative control sample.

## 887 Materials and methods references

- 888 38. Sturm, D. *et al.* Improved Protocol For Laser Microdissection Of Human Pancreatic  
889 Islets From Surgical Specimens. *J. Vis. Exp.* 2–7 (2013). doi:10.3791/50231
- 890 39. Martin, M. Cutadapt removes adapter sequences from high-throughput sequencing  
891 reads. *EMBnet.journal; Vol 17, No 1 Next Gener. Seq. Data Anal.* -  
892 10.14806/ej.17.1.200 (2011).
- 893 40. Wingett, S. W. & Andrews, S. FastQ Screen: A tool for multi-genome mapping and  
894 quality control. *F1000Research* 7, 1338 (2018).
- 895 41. Davis, M. P. A., van Dongen, S., Abreu-Goodger, C., Bartonicek, N. & Enright, A. J.  
896 Kraken: A set of tools for quality control and analysis of high-throughput sequence  
897 data. *Methods* 63, 41–49 (2013).
- 898 42. Dobin, A. *et al.* STAR: Ultrafast universal RNA-seq aligner. *Bioinformatics* 29, 15–21  
899 (2013).
- 900 43. Anders, S., Pyl, P. T. & Huber, W. HTSeq-A Python framework to work with high-  
901 throughput sequencing data. *Bioinformatics* 31, 166–169 (2015).
- 902 44. Wang, L., Wang, S. & Li, W. RSeQC: Quality control of RNA-seq experiments.  
903 *Bioinformatics* 28, 2184–2185 (2012).
- 904 45. Love, M. I., Huber, W. & Anders, S. Moderated estimation of fold change and  
905 dispersion for RNA-seq data with DESeq2. *Genome Biol.* 15, (2014).

- 906 46. Ritchie, M. E. *et al.* Limma powers differential expression analyses for RNA-  
907 sequencing and microarray studies. *Nucleic Acids Res.* **43**, e47 (2015).
- 908 47. Smyth, G. K. *et al.* RNA-seq analysis is easy as 1-2-3 with limma, Glimma and  
909 edgeR. *F1000Research* **5**, (2018).
- 910 48. Yu, G., Wang, L. G., Han, Y. & He, Q. Y. ClusterProfiler: An R package for comparing  
911 biological themes among gene clusters. *Omi. A J. Integr. Biol.* **16**, 284–287 (2012).
- 912 49. Surma, M. A. *et al.* An automated shotgun lipidomics platform for high throughput,  
913 comprehensive, and quantitative analysis of blood plasma intact lipids. *Eur. J. Lipid*  
914 *Sci. Technol.* **117**, 1540–1549 (2015).
- 915 50. Smilde, A. K., Kiers, H. A. L., Bijlsma, S., Rubingh, C. M. & Van Erk, M. J. Matrix  
916 correlations for high-dimensional data: The modified RV-coefficient. *Bioinformatics* **25**,  
917 401–405 (2009).
- 918 51. Bylesjö, M., Rantalainen, M., Nicholson, J. K., Holmes, E. & Trygg, J. K-OPLS  
919 package: Kernel-based orthogonal projections to latent structures for prediction and  
920 interpretation in feature space. *BMC Bioinformatics* **9**, (2008).
- 921 52. Kulak, N. A., Pichler, G., Paron, I., Nagaraj, N. & Mann, M. Minimal, encapsulated  
922 proteomic-sample processing applied to copy-number estimation in eukaryotic cells.  
923 *Nat. Methods* **11**, 319–324 (2014).
- 924 53. Cox, J. & Mann, M. MaxQuant enables high peptide identification rates, individualized  
925 p.p.b.-range mass accuracies and proteome-wide protein quantification. *Nat.*  
926 *Biotechnol.* **26**, 1367–1372 (2008).
- 927 54. Prianichnikov, N. *et al.* Maxquant software for ion mobility enhanced shotgun  
928 proteomics. *Mol. Cell. Proteomics* **19**, 1058–1069 (2020).
- 929 55. Cox, J. *et al.* Accurate proteome-wide label-free quantification by delayed  
930 normalization and maximal peptide ratio extraction, termed MaxLFQ. *Mol. Cell.*  
931 *Proteomics* **13**, 2513–2526 (2014).
- 932 56. Tyanova, S. *et al.* The Perseus computational platform for comprehensive analysis of  
933 (prote)omics data. *Nature Methods* **13**, 731–740 (2016).

- 934 57. Hu, J., Ge, H., Newman, M. & Liu, K. OSA: A fast and accurate alignment tool for  
935 RNA-Seq. *Bioinformatics* **28**, 1933–1934 (2012).
- 936 58. Li, B., Ruotti, V., Stewart, R. M., Thomson, J. A. & Dewey, C. N. RNA-Seq gene  
937 expression estimation with read mapping uncertainty. *Bioinformatics* **26**, 493–500  
938 (2009).
- 939

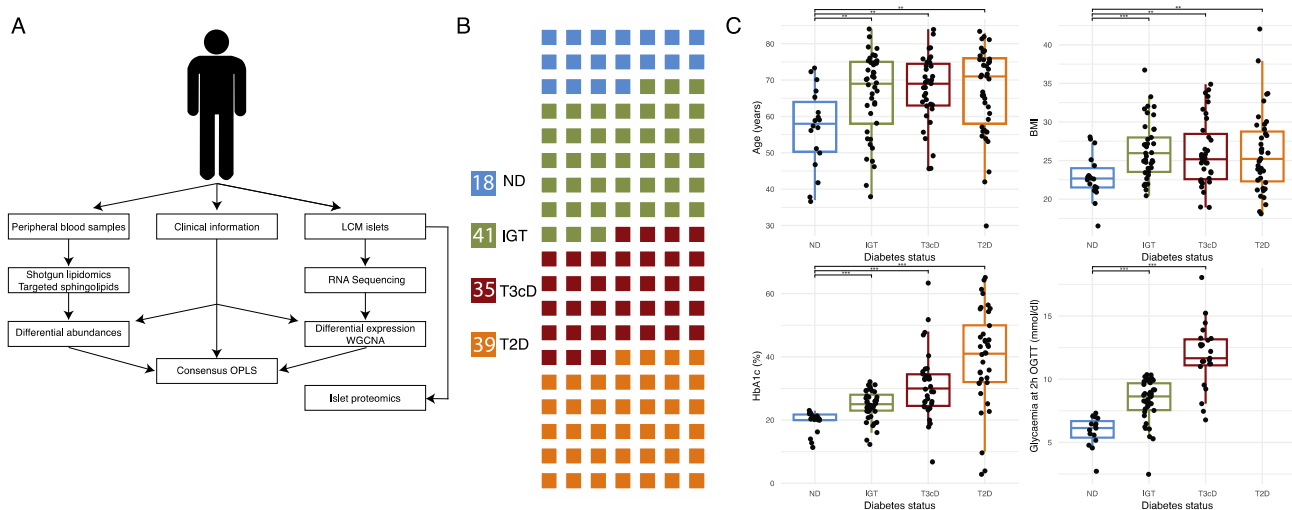

940  
 941 **Figure 1: Overview of the experimental procedures and cohort characteristics.** A)  
 942 Experimental procedures overview. Clinical data and peripheral blood were collected  
 943 preoperatively, and the snap-frozen surgical pancreatic tissue used for LCM of the islets of  
 944 Langerhans. Blood samples were analyzed for lipidomics, while LCM islets for transcriptomics  
 945 and proteomics. Omics datasets were individually evaluated in relationship to glycemic  
 946 status and further integrated with each other using Consensus Orthogonal Partial Least  
 947 Squares (OPLS) analysis. B) Waffle plot showing the structure of the cohort in terms of  
 948 glycemic/diabetes categories based on American Diabetes Association criteria. Absolute  
 949 numbers for each category are given in the legend boxes. C) Boxplots of four major clinical  
 950 parameters relevant for diabetes diagnosis and management. Statistically significant differences  
 951 from ND PPP were determined using the Student's t-test ( $*p < 0.05$ ;  $**p < 0.01$ ). LCM Laser  
 952 Capture Microdissection, ND Non-diabetic, IGT Impaired Glucose Tolerance, T3cD Type 3c  
 953 Diabetes, T2D Type 2 Diabetes.  
 954



955

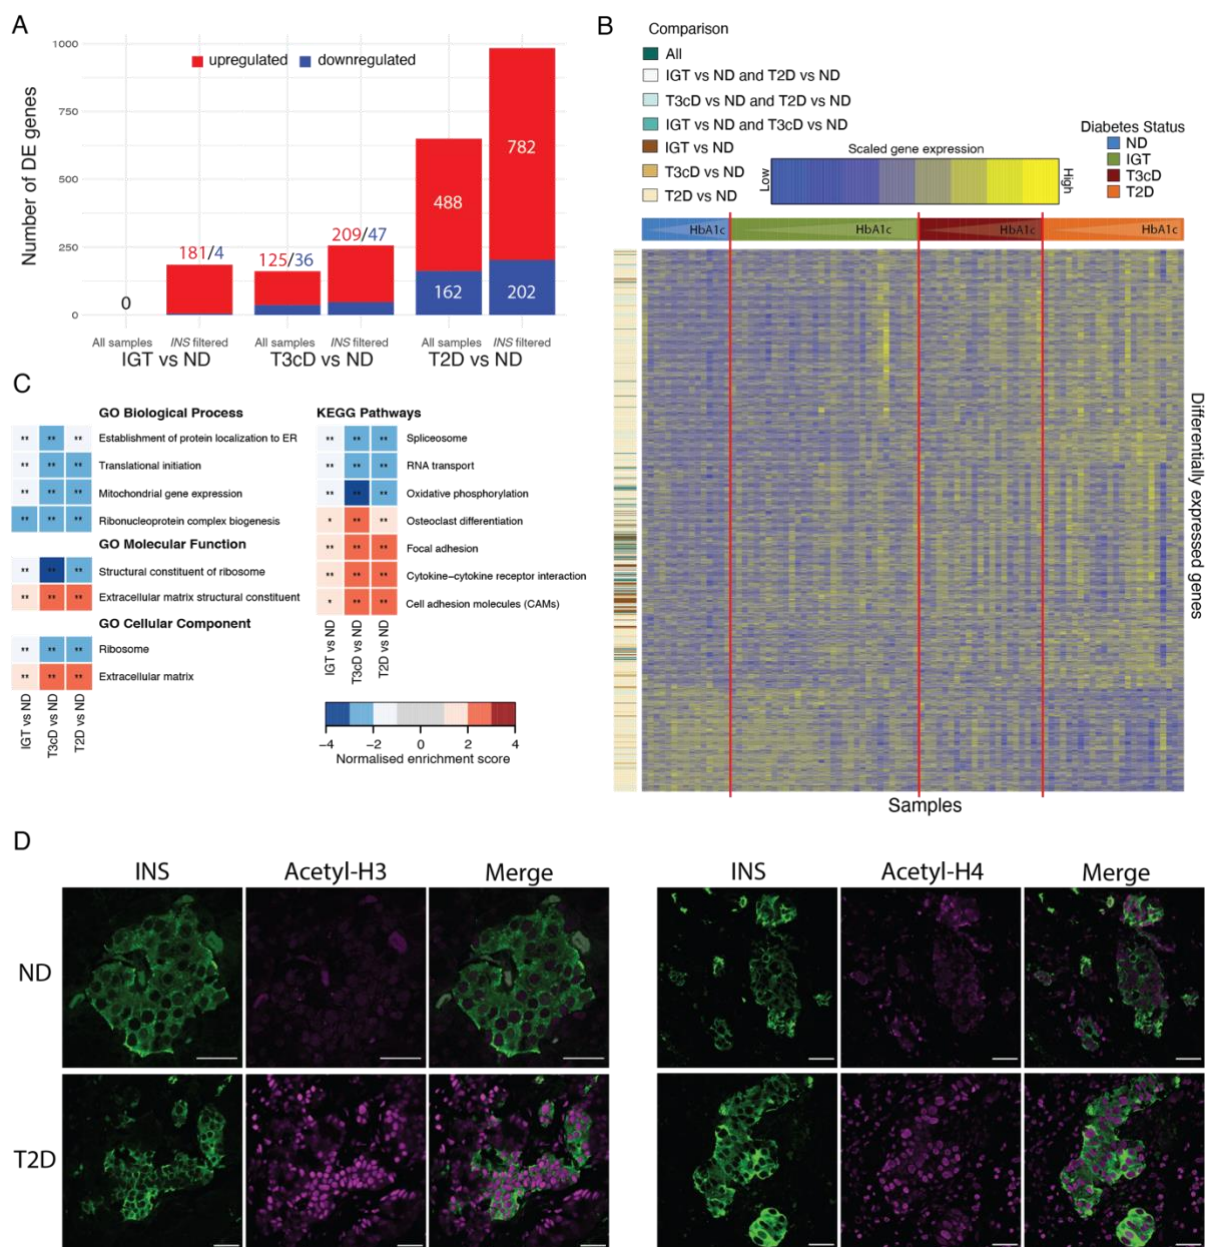

956

957

958

959

960

961

962

963

964

965

966

967

968

969

970

971

**Figure 2: Transcriptional changes between non-diabetic, pre-diabetic and diabetic**

patients. A) Number of DE genes identified by comparing glycaemic groups of PPP in the entire (all samples) or “restricted” cohort (*INS* filtered). B) Gene expression profile of DE genes in the “restricted” cohort. Columns represent patients grouped according to their glycaemic status and ordered based on increasing HbA1c levels. Rows, representing DE genes (variance stabilizing transformation normalized counts), were clustered based on Euclidean distance. The colored side bar indicates in which comparisons a gene was identified as differentially expressed. C) Gene Set Enrichment Analysis of DE genes between IGT, T3cD or T2D and ND PPP in the “restricted” cohort. GO terms and KEGG pathways are colored according to the normalized enrichment score. Corresponding p-values are also indicated ( $*p < 0.05$ ,  $**p < 0.01$ ). D) Immunofluorescence for insulin (green), acetylated histones H3 (left) and H4 (right) (magenta) in representative samples of formalin fixed paraffin embedded pancreatic tissues from ND and T2D PPP. Scale bars correspond to 20 $\mu$ m. DE differentially expressed, ND Non-diabetic, IGT Impaired Glucose Tolerance, T3cD Type 3c Diabetes, T2D Type 2 Diabetes.



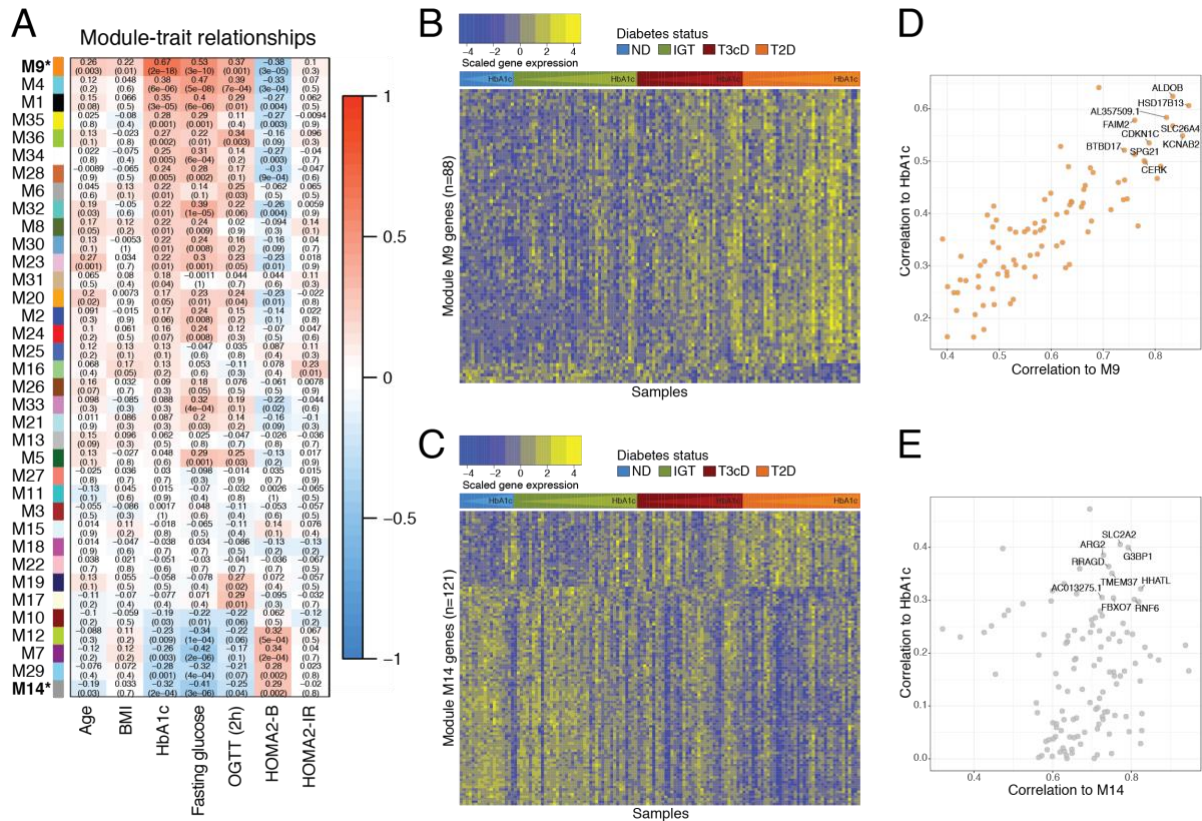

972  
 973 **Figure 3: Identification of co-expressed gene modules related to diabetes traits.** A)  
 974 Correlation between module eigengenes and clinical traits including age, BMI, HbA1c, fasting  
 975 glucose, OGTT at 2 hours, HOMA2-B and HOMA2-IR. Each cell contains the corresponding  
 976 Spearman correlation coefficient and Student *p* value (in parenthesis). Cells are colored  
 977 according to their correlation to clinical traits. Modules are ordered based on their correlation to  
 978 HbA1c. B-C) Gene expression profiles of gene modules M9 (B) and M14 (C). Columns,  
 979 representing PPP, were grouped according to their glycemic status and ordered based on  
 980 increasing HbA1c levels. Rows, representing genes (variance stabilizing transformation  
 981 normalized counts), were clustered based on Euclidean distance. D-E) Scatter plot of module  
 982 membership vs. gene significance for HbA1c in modules M9 and M14. Genes with the highest  
 983 module membership and gene significance (“hub genes”) are labeled. ND Non-diabetic, IGT  
 984 Impaired Glucose Tolerance, T3cD Type 3c Diabetes, T2D Type 2 Diabetes.  
 985

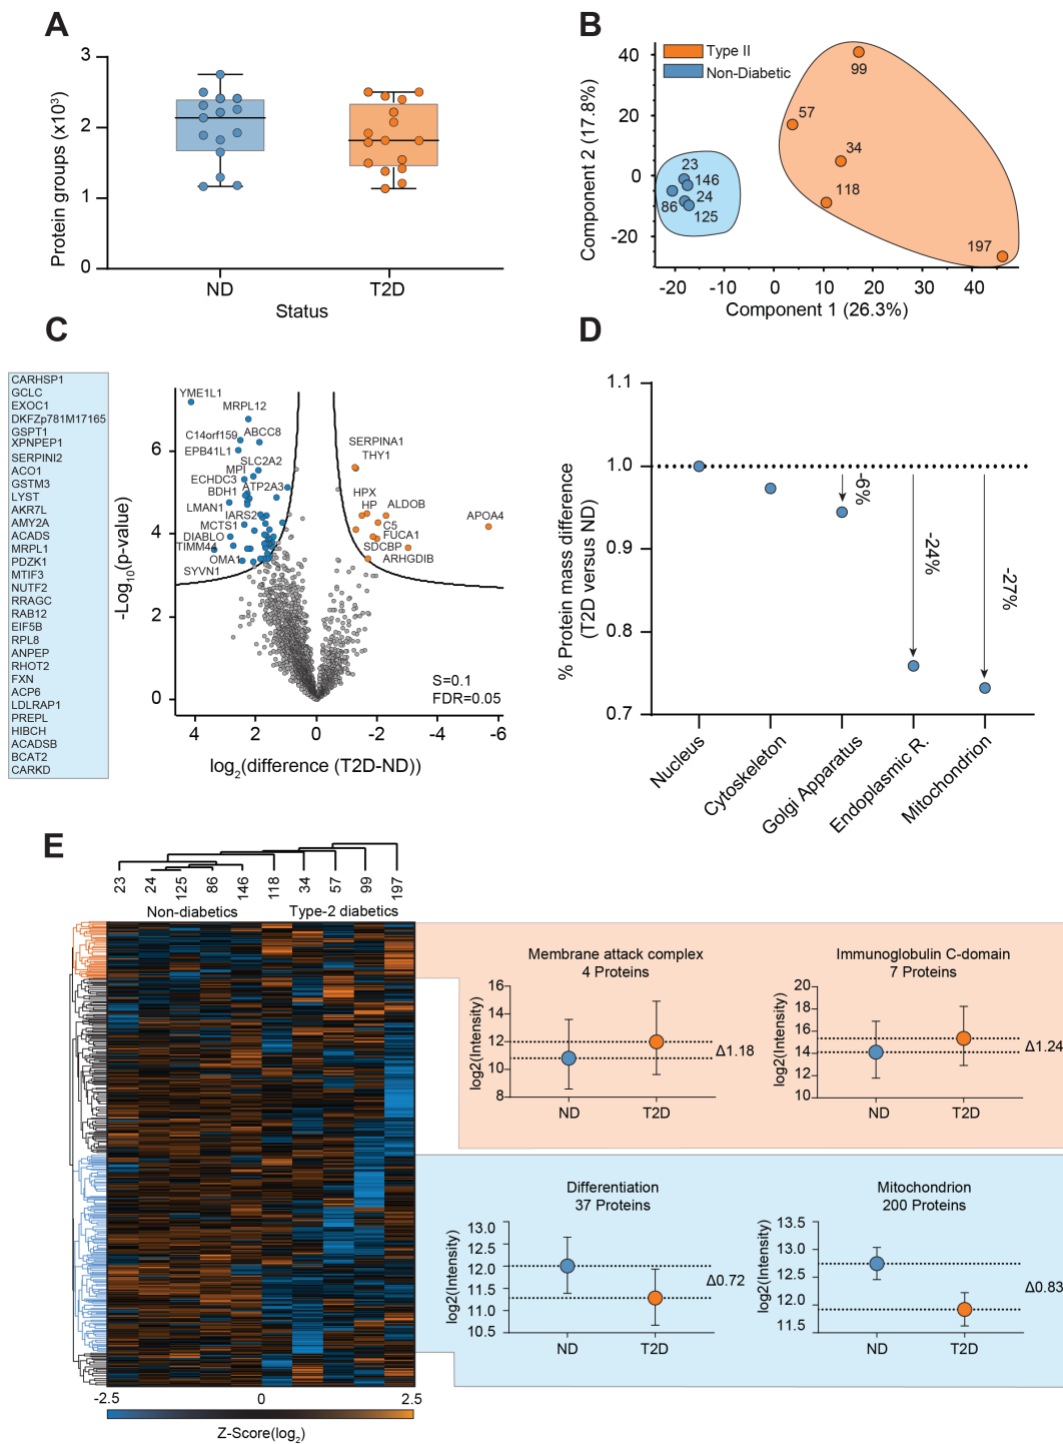

986

987 **Figure 4: Proteomics Analysis.** A) Number of identified proteins from pooled human pancreatic

988 islet cells isolated by LCM from PPP classified as non-diabetic (ND, N=5) or with T2D (N=5). B)

989 Principal Component Analysis (PCA) of all grouped pancreatic islet measurements (ND=blue,

990 T2D=orange). C) Volcano plot comparing  $p$  values and  $\log_2$ -fold changes between islets of ND

991 and T2D PPP. D) Percentage distribution of total protein islet mass and its contribution per

992 organelle between ND and T2D PPP. The ND/T2D islet protein mass ratio in different organelles

993 was normalized by the nucleus protein mass. E) Hierarchical clustering of all islet proteins

994 identified in the T2D and ND PPP clusters.  $\log_2$ -transformed intensity values were normalized by

995 z-scoring before the clustering followed by one-dimensional gene ontology enrichment for

996 cellular compartment and keywords for each of the clusters. ND Non-diabetic, T2D Type 2

997 Diabetes.

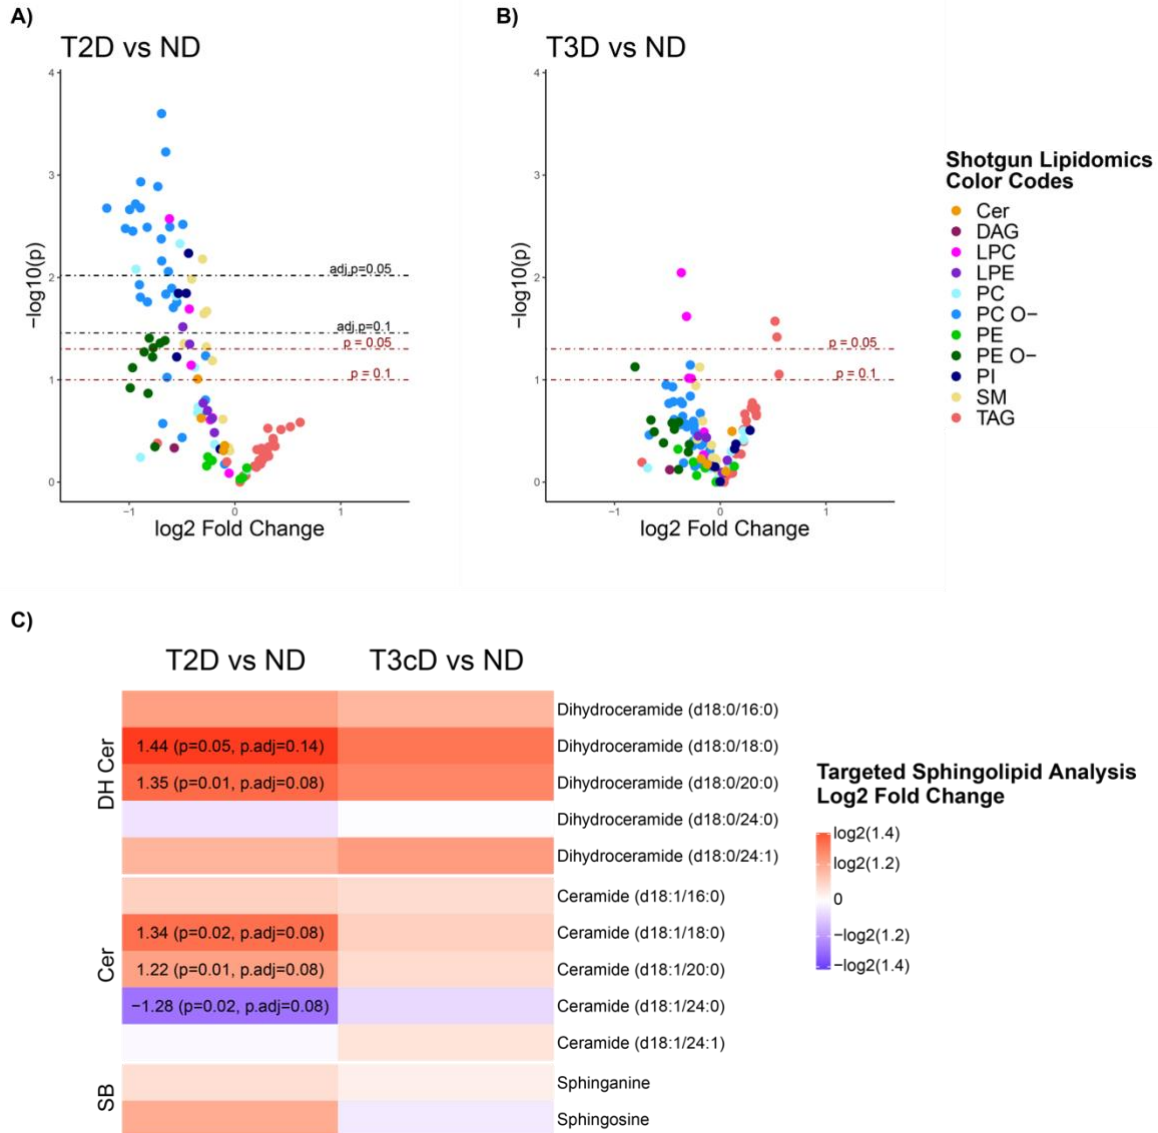

998  
999

1000 **Figure 5: Results from lipidomics differential analysis.** A-B) Shotgun lipidomics covering a  
 1001 variety of lipid classes: Ceramides (Cer), Diacylglycerols (DAG), Lysophosphatidylcholines  
 1002 (LPC), Lysophosphatidylethanolamines (LPE), Phosphatidylcholines (PC), Ether-linked  
 1003 Phosphatidylcholines (PC O-), Phosphatidylethanolamines (PE), Ether-linked  
 1004 Phosphatidylethanolamines (PE O-), Phosphatidylinositols (PI), Sphingomyelins (SM),  
 1005 Triacylglycerols (TAG). Volcano plots represent comparisons of plasma lipid levels between ND  
 1006 and T2D PPP. The X-axis shows direction and magnitude of the change; the Y-axis represents  
 1007 the statistical significance of the change. Each point is a lipid species, colored by lipid class to  
 1008 highlight class-specific trends. C) Targeted lipidomics on dihydroceramides (DH Cer), ceramides  
 1009 (Cer) and Sphingoid bases (SB). Each heatmap column represents the comparisons of plasma  
 1010 levels between ND and T2D PPP. Heatmap colors represent direction and magnitude of the  
 1011 change. Log<sub>2</sub> Fold Change: ratio of mean lipid concentration in the two groups, log<sub>2</sub> transformed.  
 1012 Statistical model used for all panels: linear regression with age and sex as covariates (p: p  
 1013 value); adjustment of p values across all lipid species by the Benjamini-Hochberg method (adj. p:  
 1014 adjusted p value). T2D Type 2 Diabetes, T3cD Type 3 Diabetes, ND & PD non-diabetic and pre-  
 1015 diabetic (with impaired fasting glucose and/or impaired glucose tolerance) with HbA1c<6.0.  
 1016

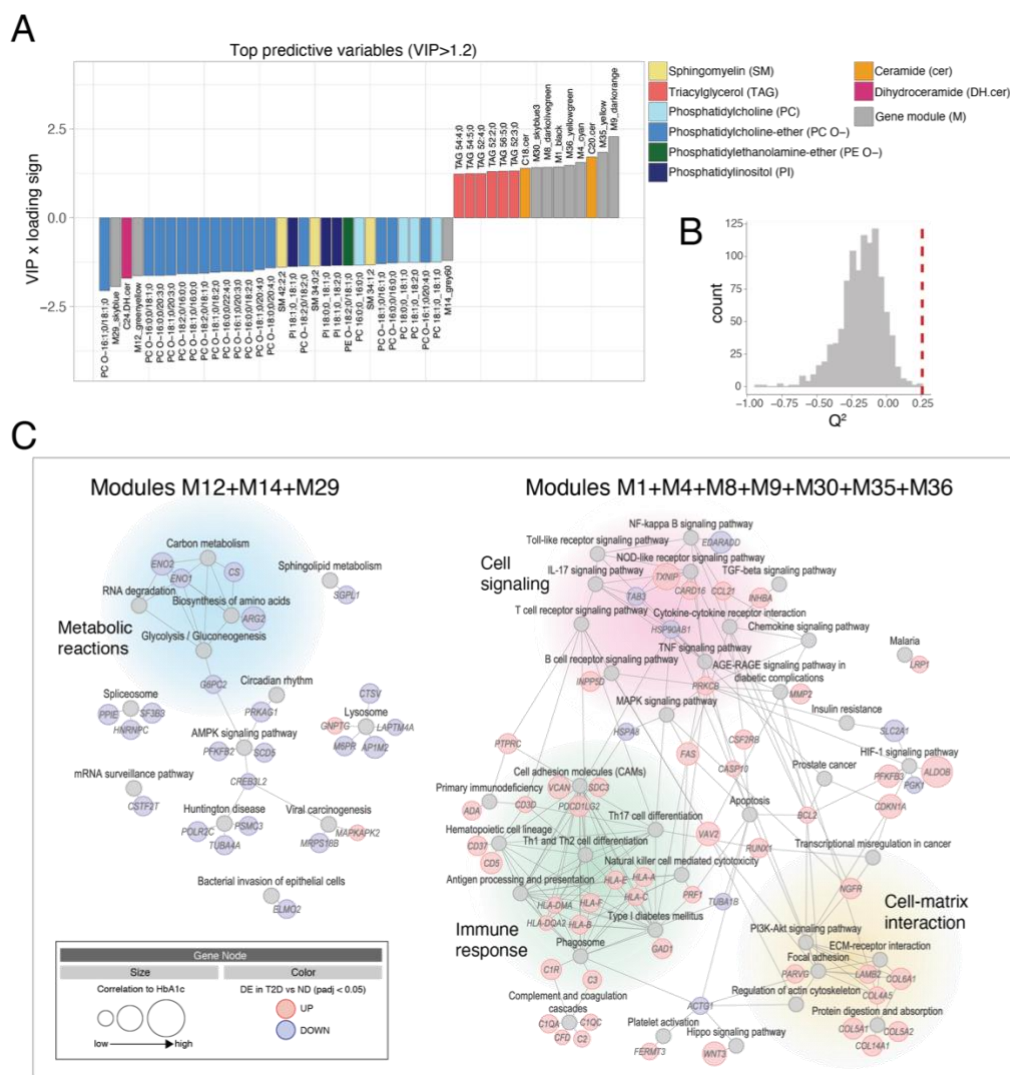

1017  
 1018 **Figure 6: Multiblock data modeling of HbA1c.** A) Barplot showing the variable importance in  
 1019 the multiblock consensus OPLS model. The Y-axis represents the importance scores for the  
 1020 predictors multiplied by the sign of the loadings on the predictive latent variable. Variables with  
 1021 importance in projection  $> 1.2$  were selected. B) Statistical significance of the model through  
 1022 permutation test. C) Network representation of functional pathways enriched in modules with  
 1023 best prediction scores for HbA1c. Pathways are represented as gray nodes. Genes are  
 1024 represented as nodes sized based on their correlation to HbA1c and colored based on their  
 1025 differential expression in T2D vs. ND PPP. Only genes with significant differential expression  
 1026 (adj.  $p < 0.05$ ) in the “restricted” cohort are shown. VIP Variable Importance in Projection, DE  
 1027 Differentially expressed, ND Non-diabetic, T2D Type 2 Diabetes.  
 1028

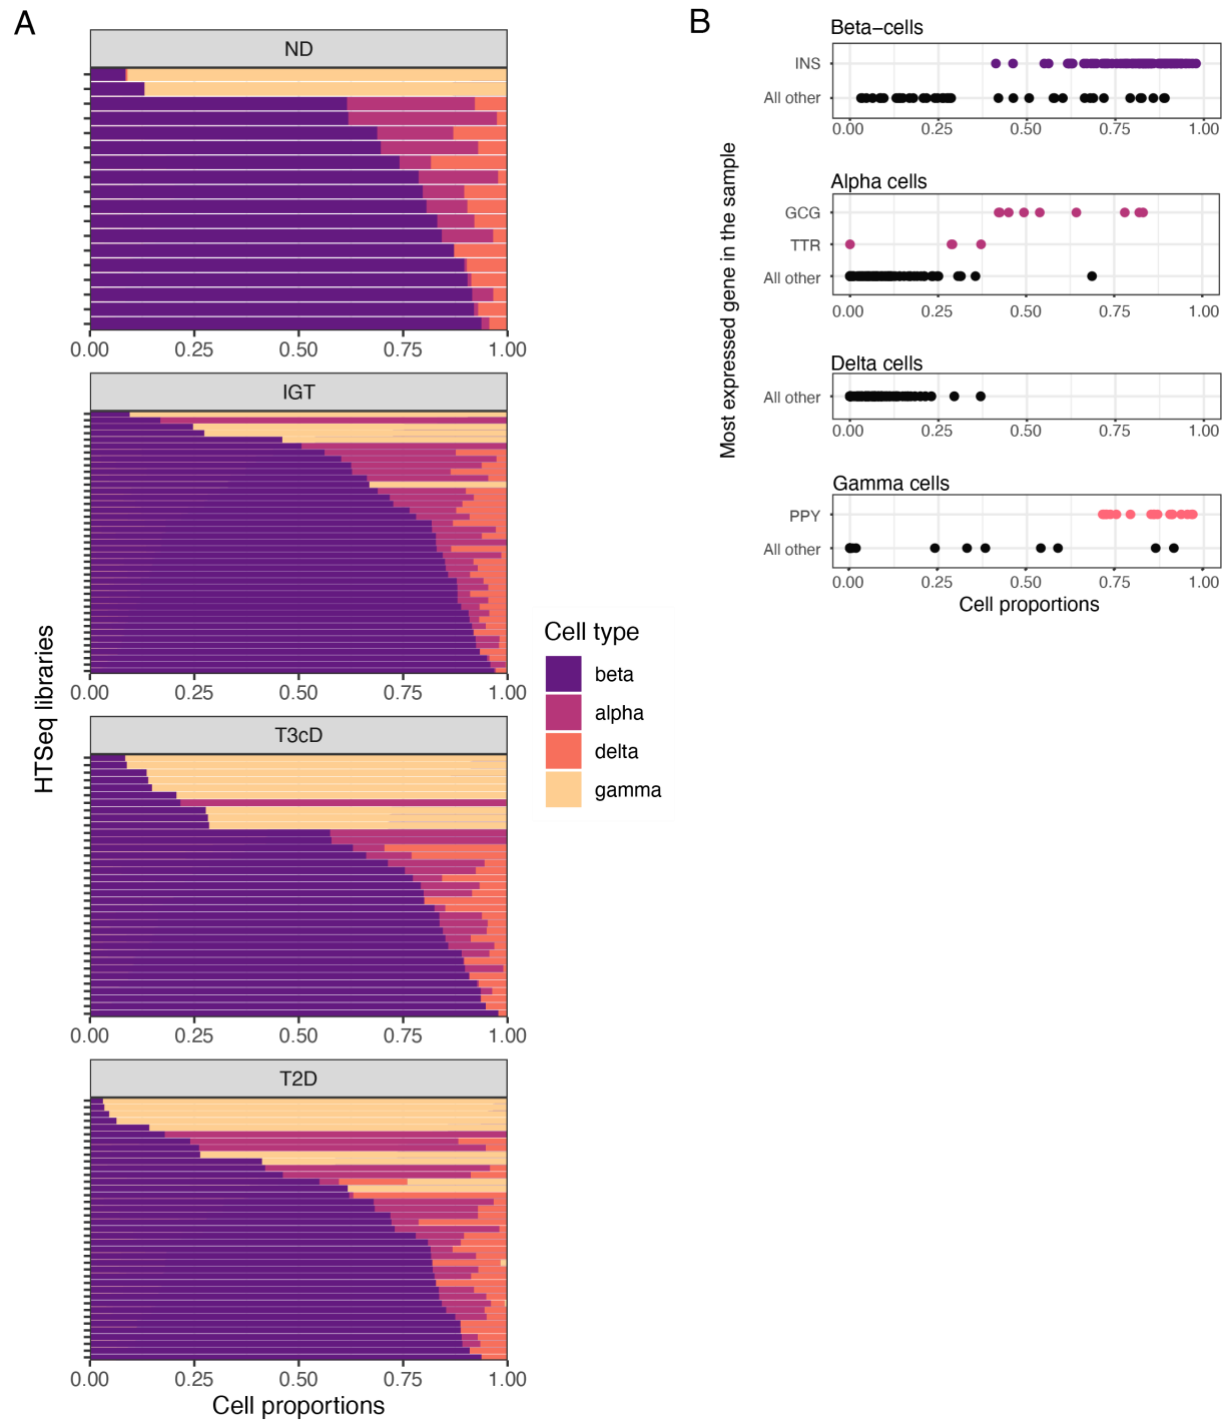

1029  
1030  
1031  
1032  
1033  
1034  
1035

**Figure S1: Deconvolution of cell types based on RNA-Seq data.** A) Cell-type proportions by sample, as estimated with DeconRNASeq, panels faceted according to diabetes status. B) Sample distribution across each cell type proportion. Highlighted are samples presenting a cell type specific gene being the most expressed. Marker genes were *GCG* and *TTR* for alpha cells, *INS* for beta cells, *SST* for delta cells, and *PPY* for gamma cells.





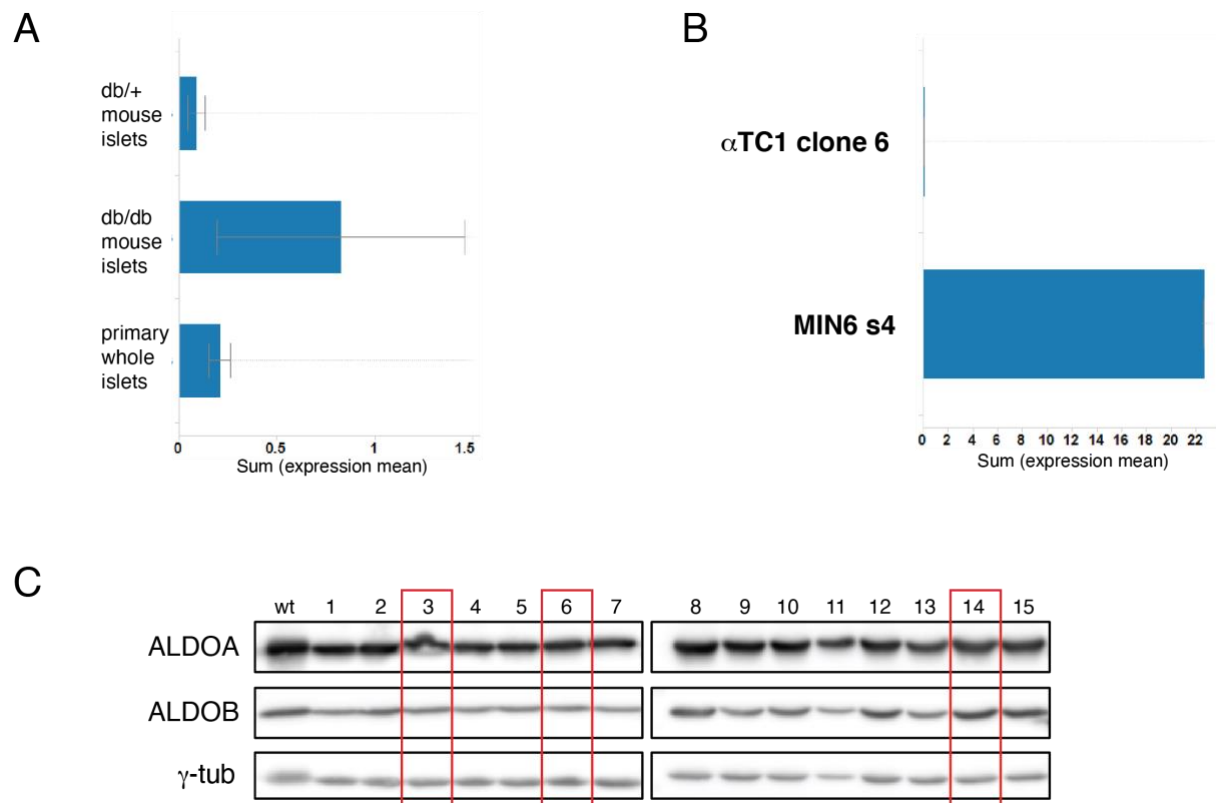

1042  
1043

1044 **Figure S3:** A-B) *ALDOB* expression (RNAseq, Illumina) in (A) islets from 13-week-old *db/db*,  
1045 *db/+* mice and *C57Bl/6* mice (3 animals/strain) or (B) mouse  $\alpha$ TC1 clone 6 alpha and Min6s4 beta  
1046 cell lines (n=4/cell line). C) Western blot of MIN6 single cell-derived clones with antibodies  
1047 against ALDOB and ALDOA. Framed lanes mark *ALDOB* knockout clones as verified by site-  
1048 specific sequencing.  
1049

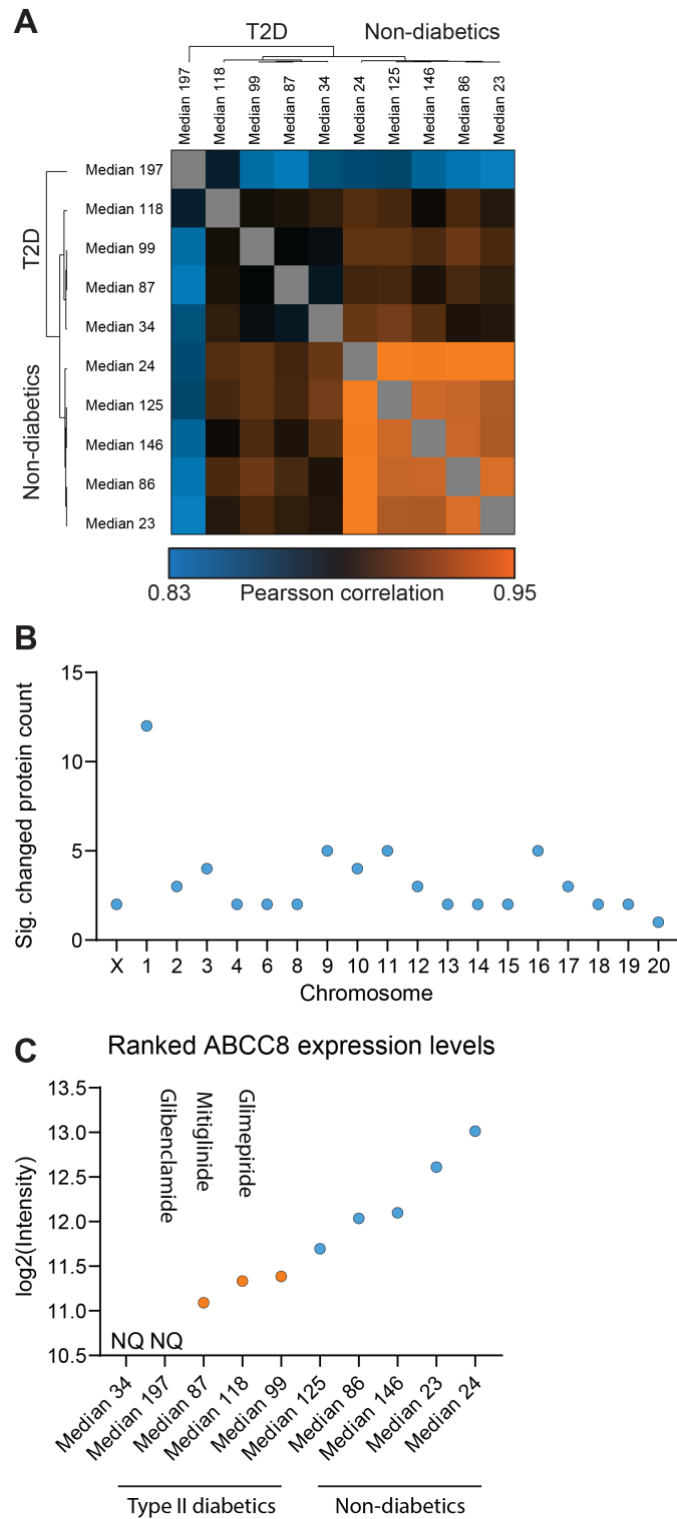

1050  
1051  
1052  
1053  
1054  
1055  
1056  
1057  
1058

**Figure S4:** Hierarchical clustering of protein expression correlations in all biological replicates highlighting the technical and biological reproducibility of our proteome data set (A). Distribution of differentially expressed proteins between T2D and ND across chromosomes (B). Ranked ABCC8 protein expression levels across T2D and ND subjects. T2D are highlighted in orange, ND are highlighted in blue. Patient 118 was treated with Glimpiride; Patient 87 was treated with Mitiglinide; Patient 197 was treated with Glibenclamide (C).



## 1059 Supplementary Table Legends

1060 **Table S1:** Clinical characteristics of the complete cohort of PPP for LCM islet RNA  
1061 sequencing. Except for absolute frequencies, all values are mean  $\pm$  standard deviation. The  
1062 statistical testing was performed with two-sided t-Test comparisons with ND ( $*p<0.05$ ,  
1063  $**p<0.01$ ,  $***p<0.001$ ).

1064 **Table S2:** Differentially expressed (DE) islet genes between T3cD and T2D PPP compared  
1065 with ND PPP in the entire cohort. No DE islet genes were identified when comparing IGT and  
1066 ND PPP. Genes were considered differentially expressed when the adjusted p value was  $\leq$   
1067 0.05 and the fold change  $> 1.5$ .

1068 **Table S3:** Clinical characteristics of the LCM islet RNA sequencing cohort with *INS* as the  
1069 highest expressed gene. Except for absolute frequencies, all values are mean  $\pm$  standard  
1070 deviation. Statistical testing was performed with two-sided t-Test comparisons with ND  
1071 ( $*p<0.05$ ,  $**p<0.01$ ,  $***p<0.001$ ).

1072 **Table S4:** Differentially expressed (DE) islet genes between IGT, T3cD or T2D PPP compared  
1073 with ND PPP in the “restricted” cohort. Genes were considered differentially expressed when  
1074 the adjusted p value was  $\leq 0.05$  and the fold change  $> 1.5$ .

1075 **Table S5:** Complete results of KEGG pathways and GO term gene set enrichment analyses  
1076 of differentially expressed genes between glycemic groups in the “restricted” PPP cohort.

1077 **Table S6:** Complete results of KEGG pathways and GO term gene set enrichment analyses  
1078 of differentially expressed genes between glycemic groups in the entire PPP cohort.

1079 **Table S7:** Significance of co-expressed gene modules.

1080 **Table S8:** Clinical characteristics of the PPP cohort for proteomic analyses.

1081 **Table S9:** Clinical characteristics of the PPP cohort for shotgun lipidomic analyses.

1082 **Table S10:** Shotgun lipidomics. Lipid classes and number of species per class included in the  
1083 data analysis.

1084 **Table S11:** Clinical characteristics of the PPP cohort for sphingolipid analyses.

1085 **Table S12:** Targeted lipidomics. Names of ceramide and sphingolipid classes included in the  
1086 data analysis.

1087 **Table S13:** Result lists of differential analysis, sorted by *p* value, in plasma shotgun lipidomic  
1088 data (first two Excel sheets) and in targeted sphingolipid data (last two Excel sheets), from  
1089 comparisons of T2D vs. ND and T3cD vs. ND PPP, with ND as defined in lipidomics result  
1090 section. All lipid species that were included in the analysis are shown. Mean lipid  
1091 concentrations were considered significantly different between groups when the adjusted *p*  
1092 value was  $\leq 0.05$ .

1093 **Table S14:** Consensus OPLS predictive scores and loadings.

1094 **Table S15:** Complete results of KEGG pathways over representation analyses of selected co-  
1095 expressed gene modules.
